# Supplementary material
Source: ML conference proceedings conference paper supplement (https://openreview.net/forum?id=4AnuvEx3an)

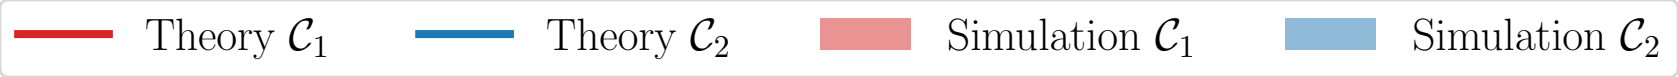

Supplement: supplementary_material [file legend_1.pdf › Transfer-Learning/legends/legend_1.pdf]

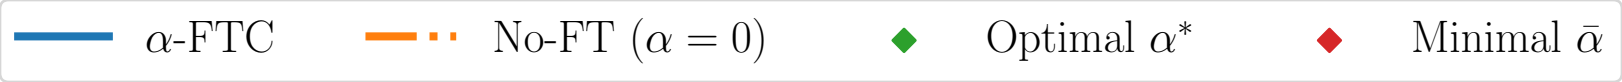

Supplement: supplementary_material [file legend_2.pdf › Transfer-Learning/legends/legend_2.pdf]

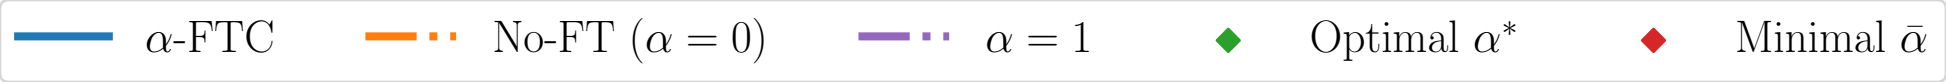

Supplement: supplementary_material [file legend_3.pdf › Transfer-Learning/legends/legend_3.pdf]

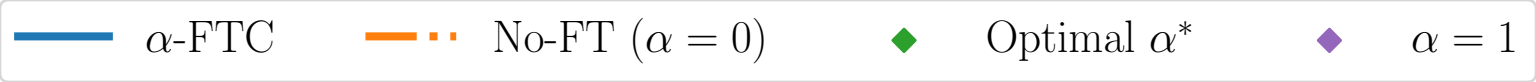

Supplement: supplementary_material [file legend_4.pdf › Transfer-Learning/legends/legend_4.pdf]

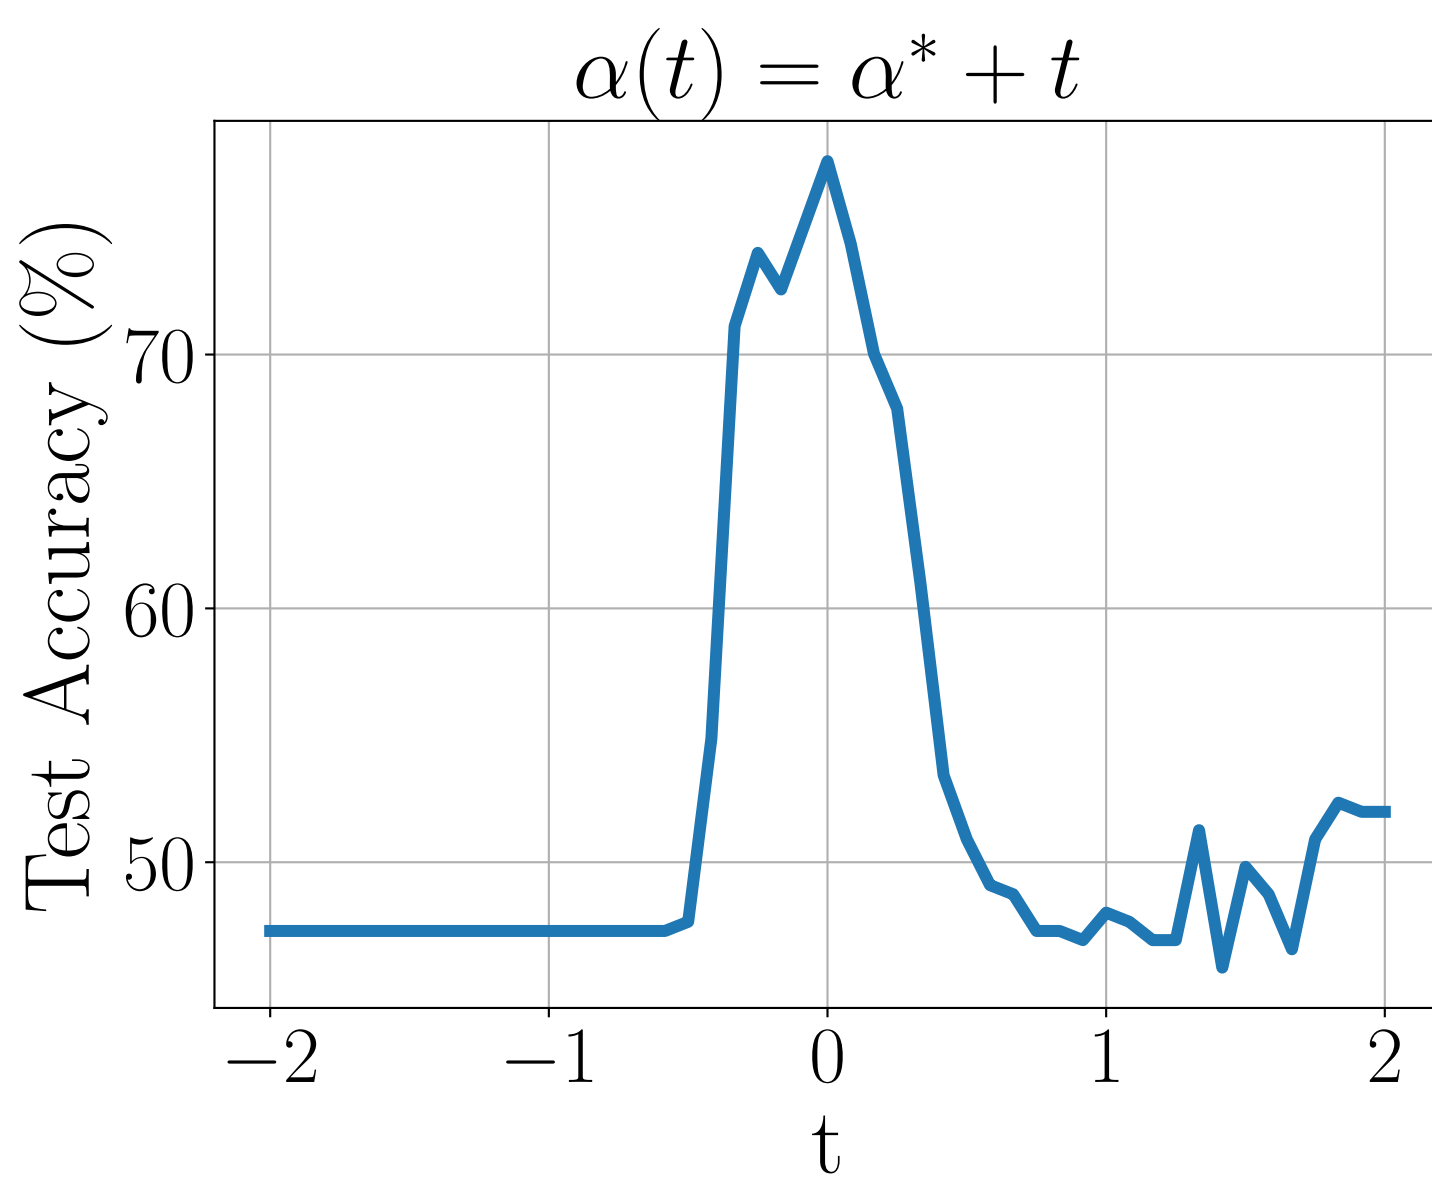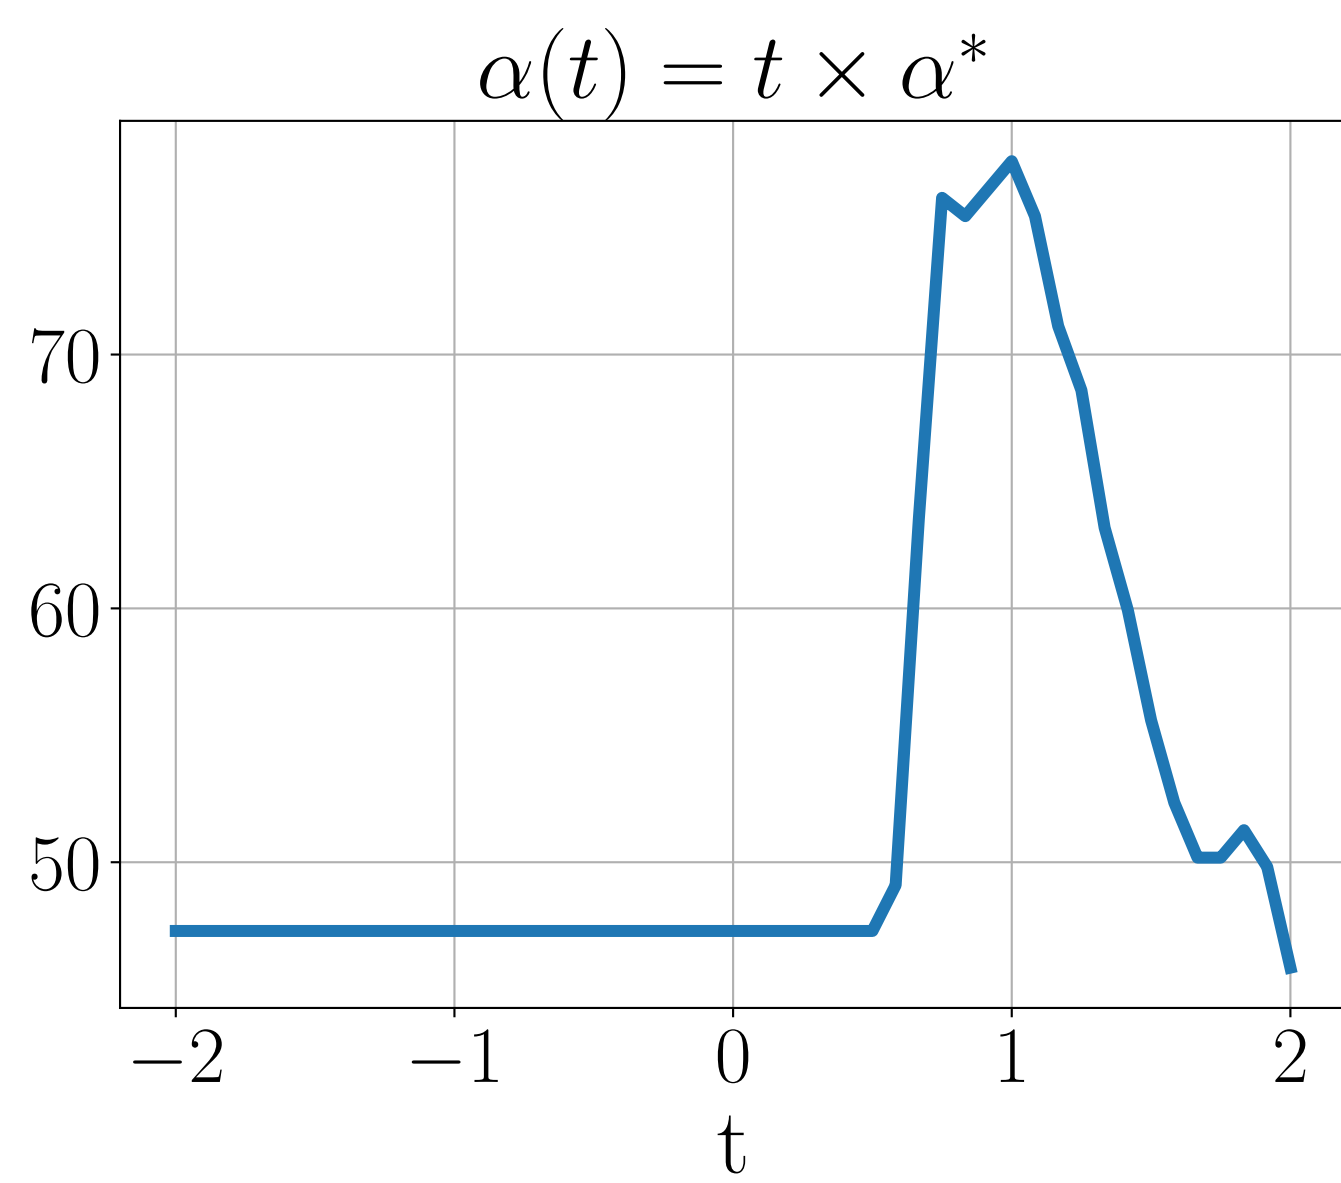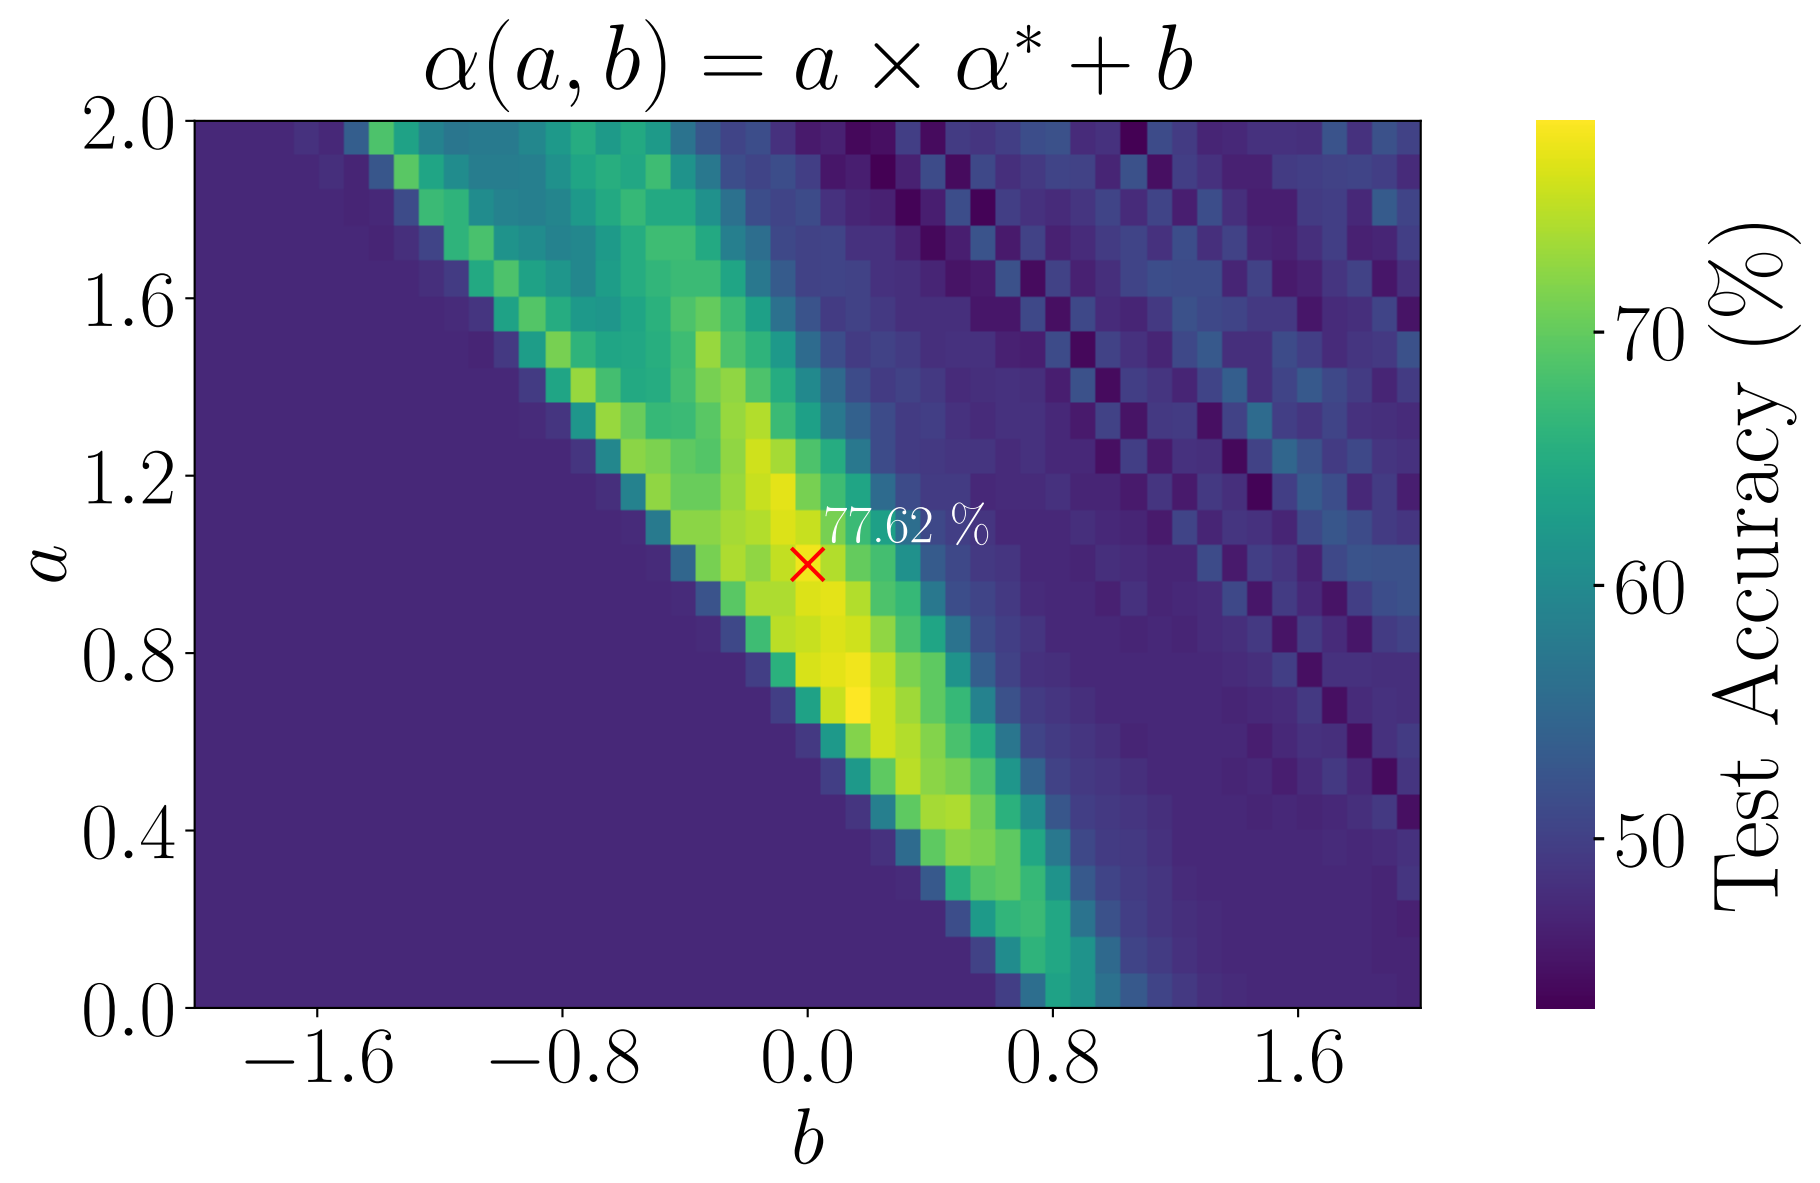

Supplement: supplementary_material [file accuracy_alpha_glue-RTE.pdf › Transfer-Learning/results-plot/accuracy_alpha_glue-RTE.pdf]

Dvd To Book

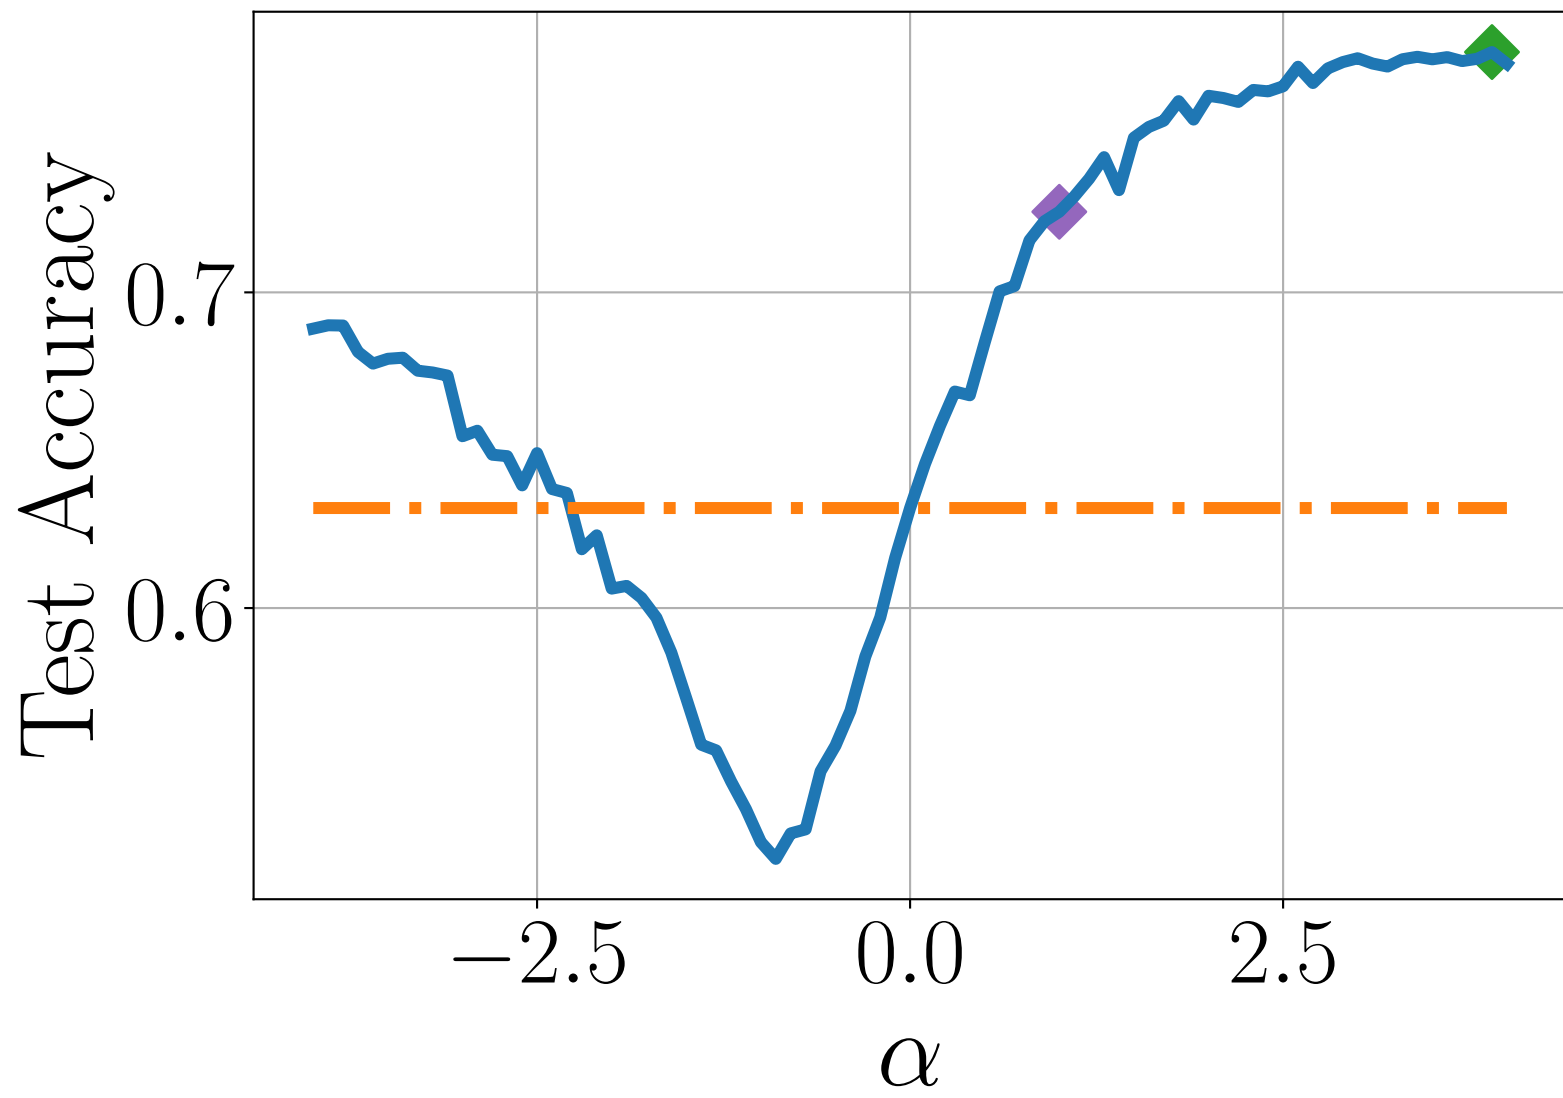

Book To Kitchen

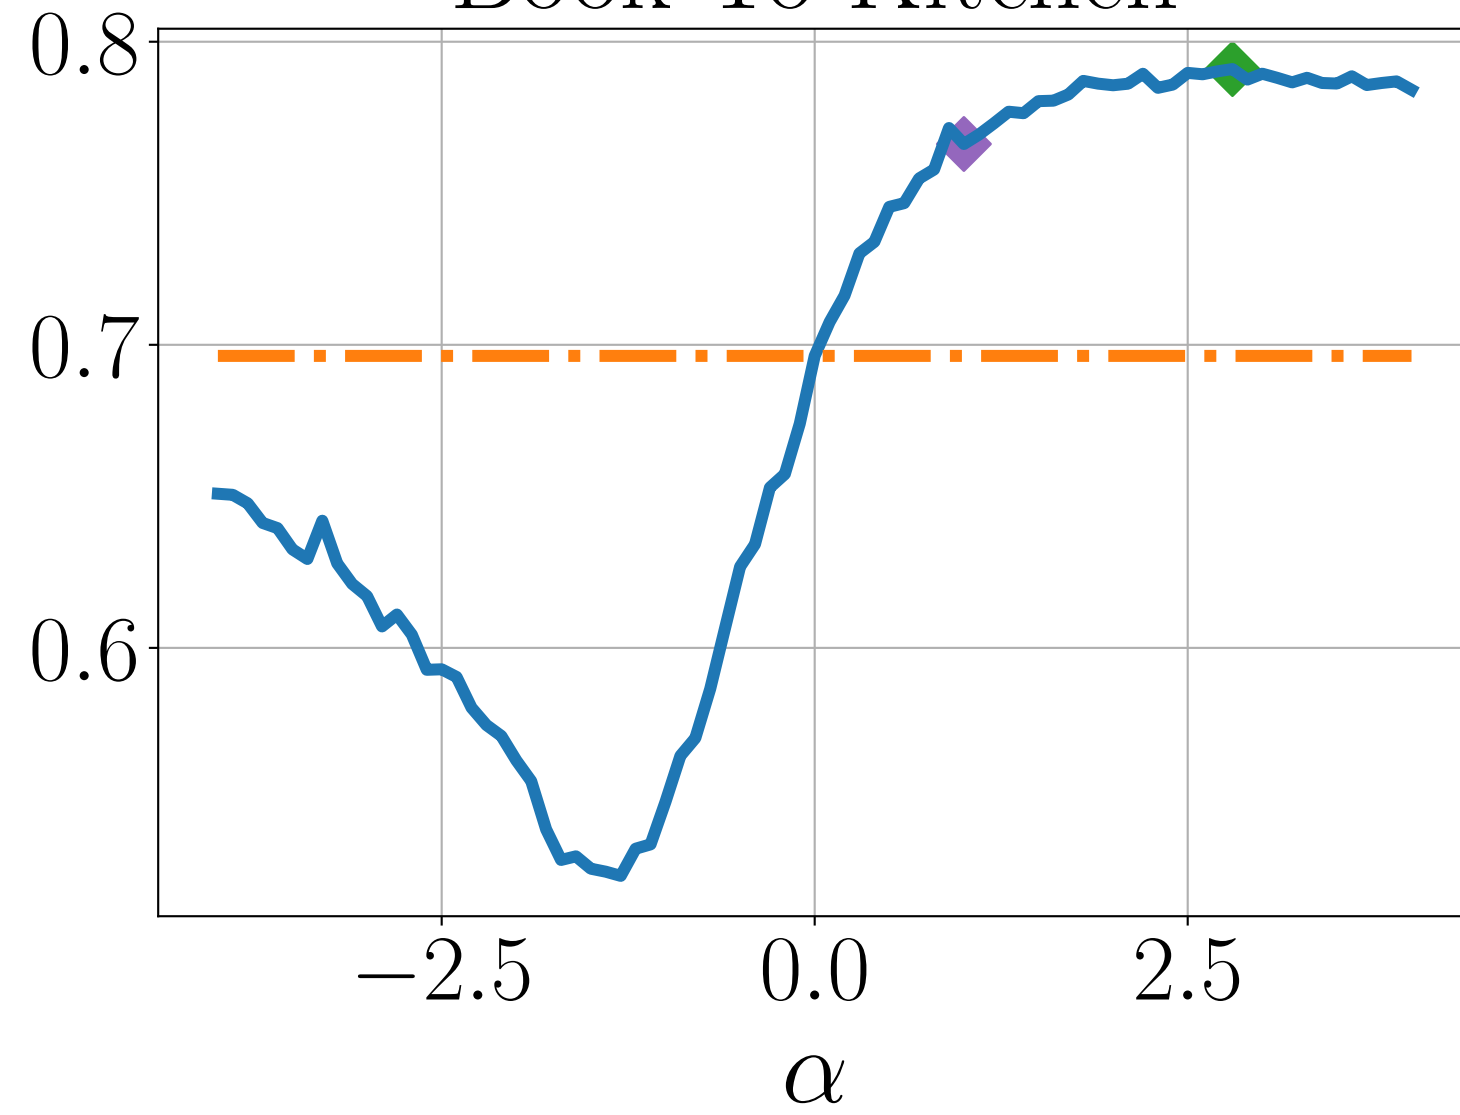

Kitchen To Elec

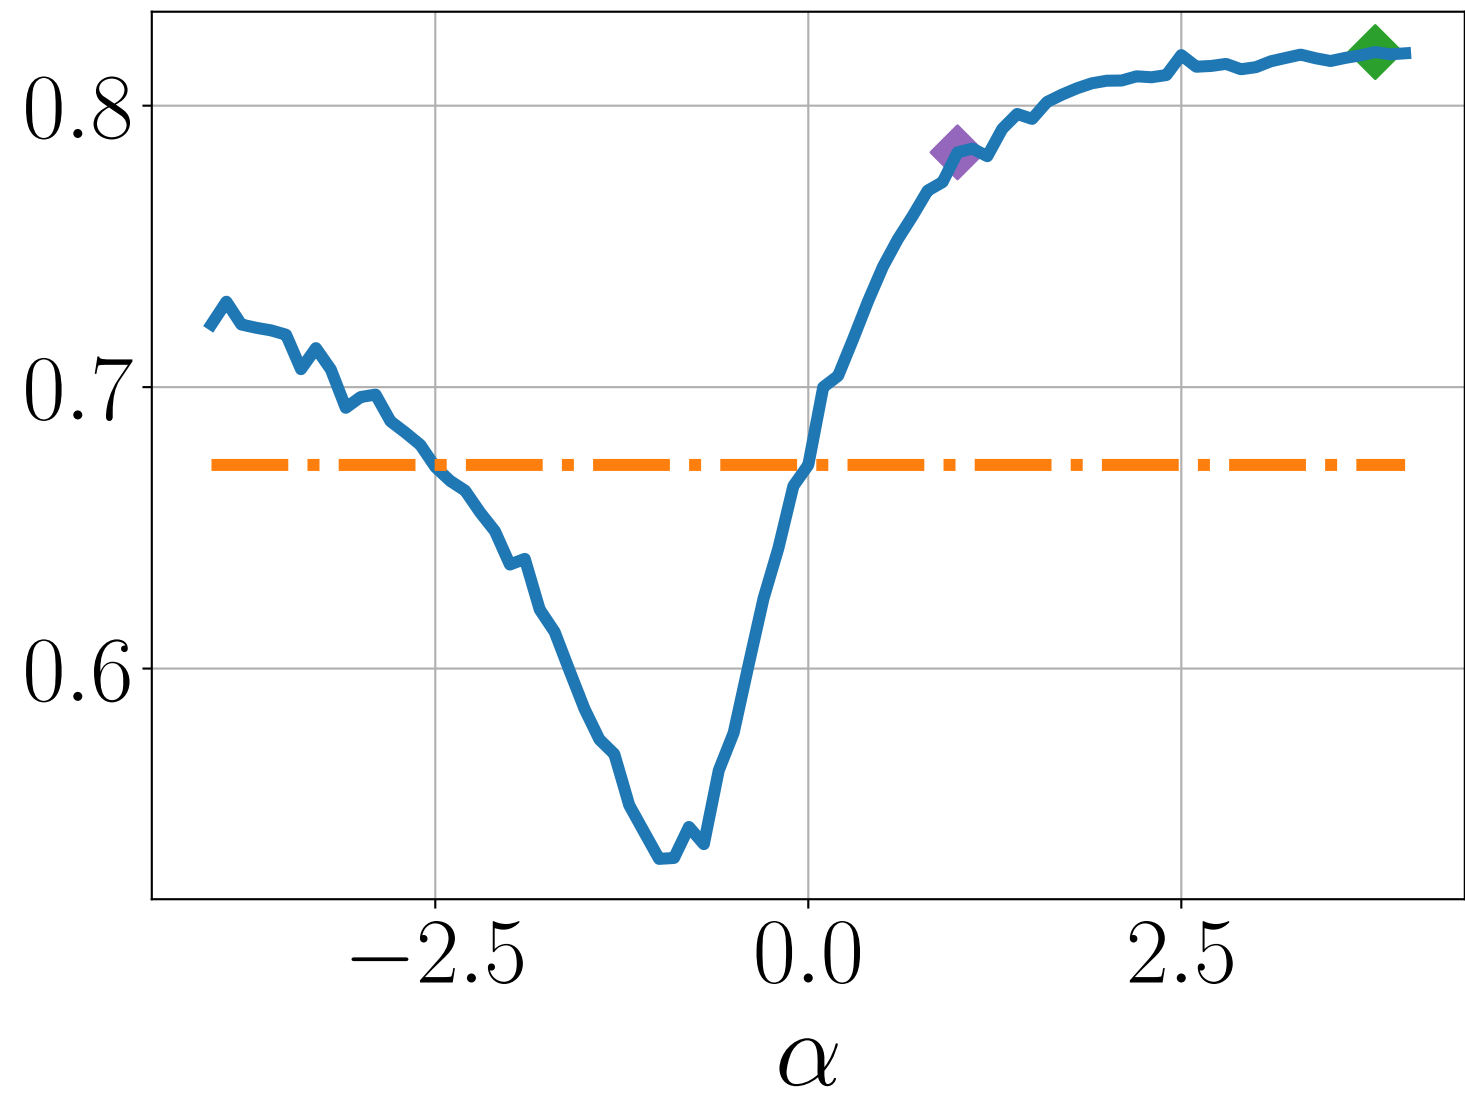

Supplement: supplementary_material [file accuracy_alpha_real-amazon-N-2000-n-40-p-400-gamma_pre-2-gamma_ft-0.1.pdf › Transfer-Learning/results-plot/accuracy_alpha_real-amazon-N-2000-n-40-p-400-gamma_pre-2-gamma_ft-0.1.pdf]

Alpha statistics across query/value layers

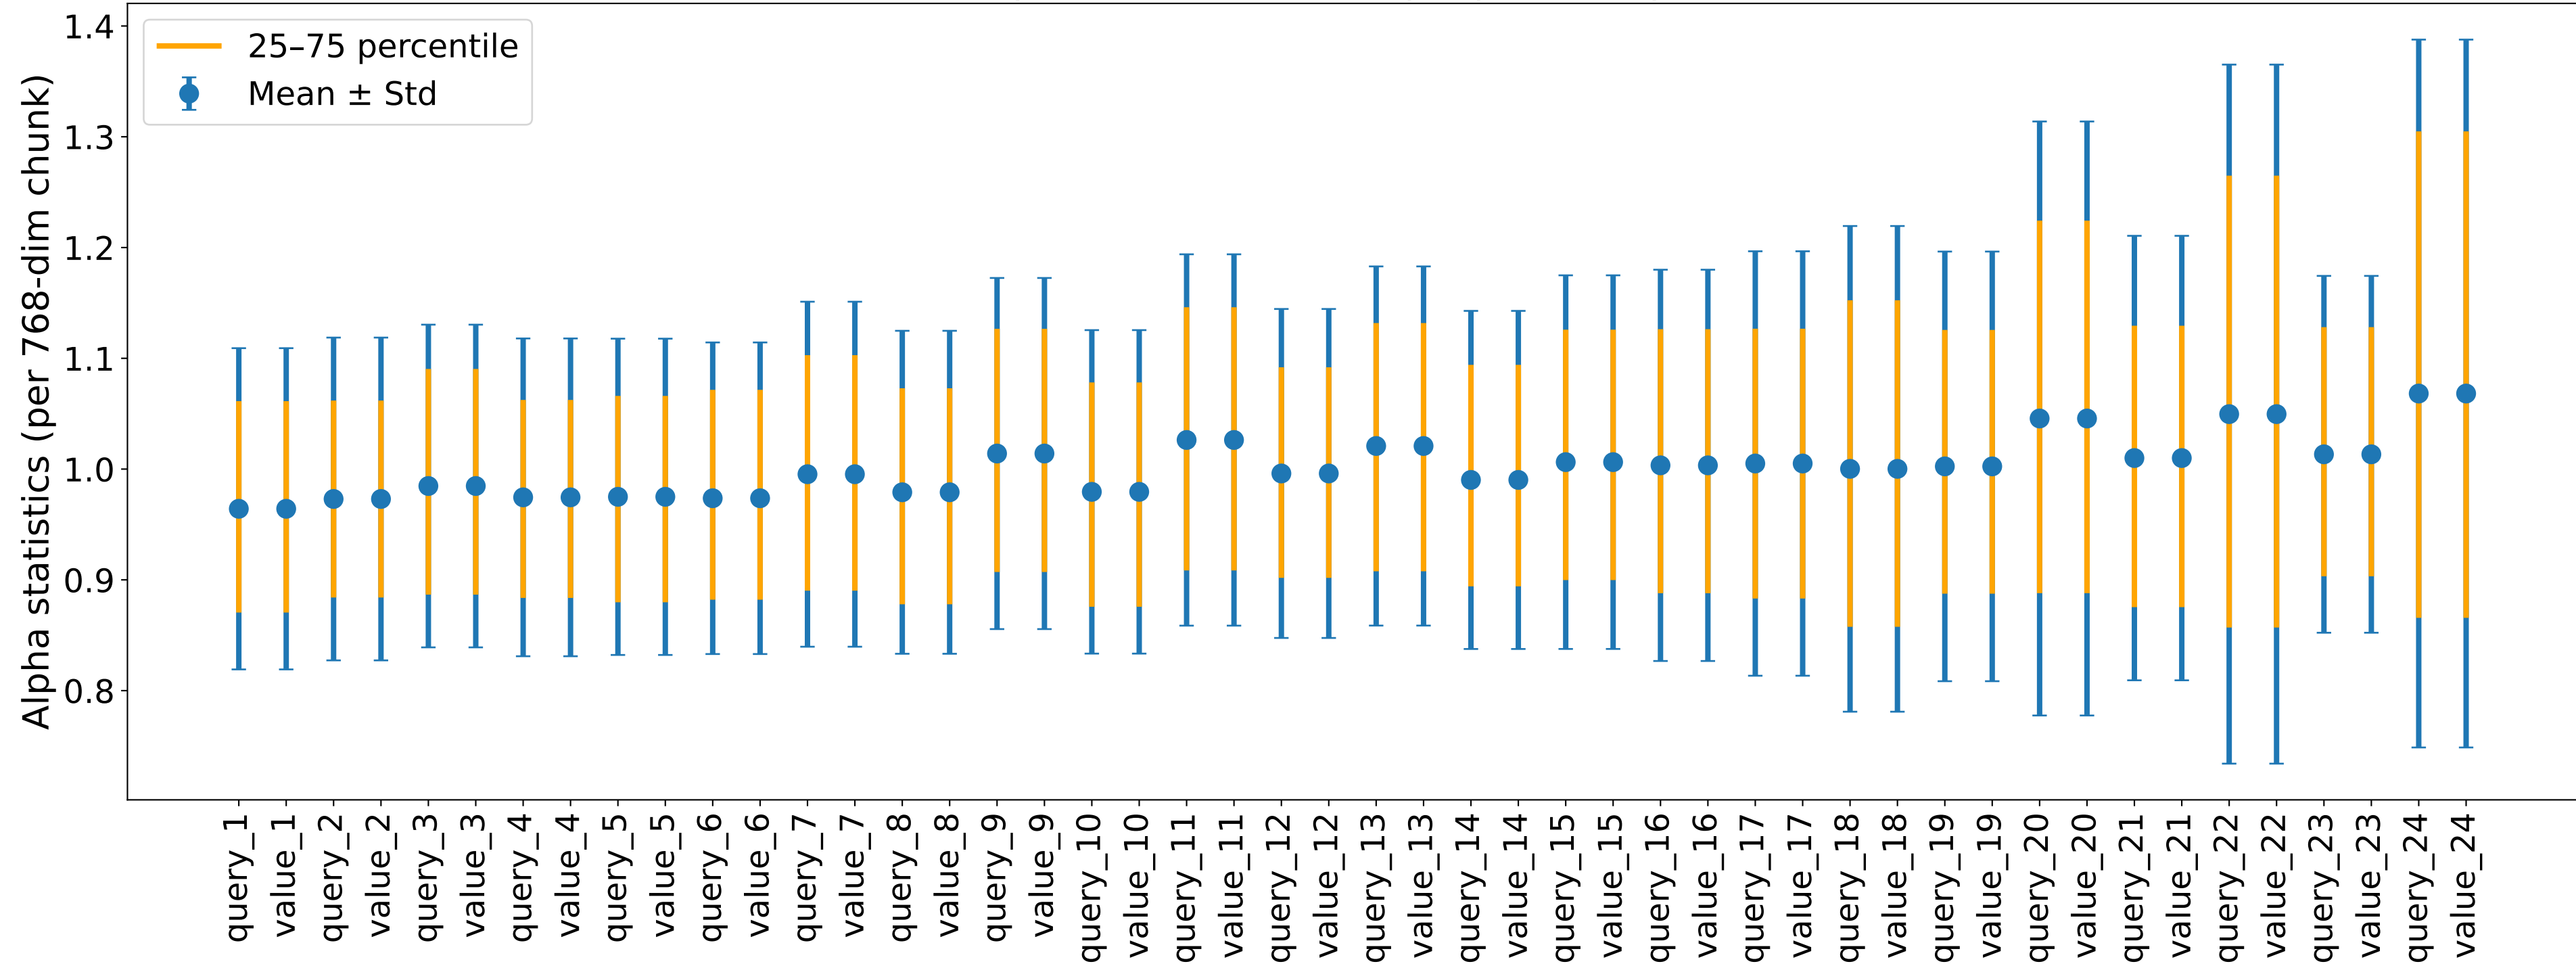

Supplement: supplementary_material [file alpha_statistics_mnli.pdf › Transfer-Learning/results-plot/alpha_statistics_mnli.pdf]

Alpha statistics across query/value layers

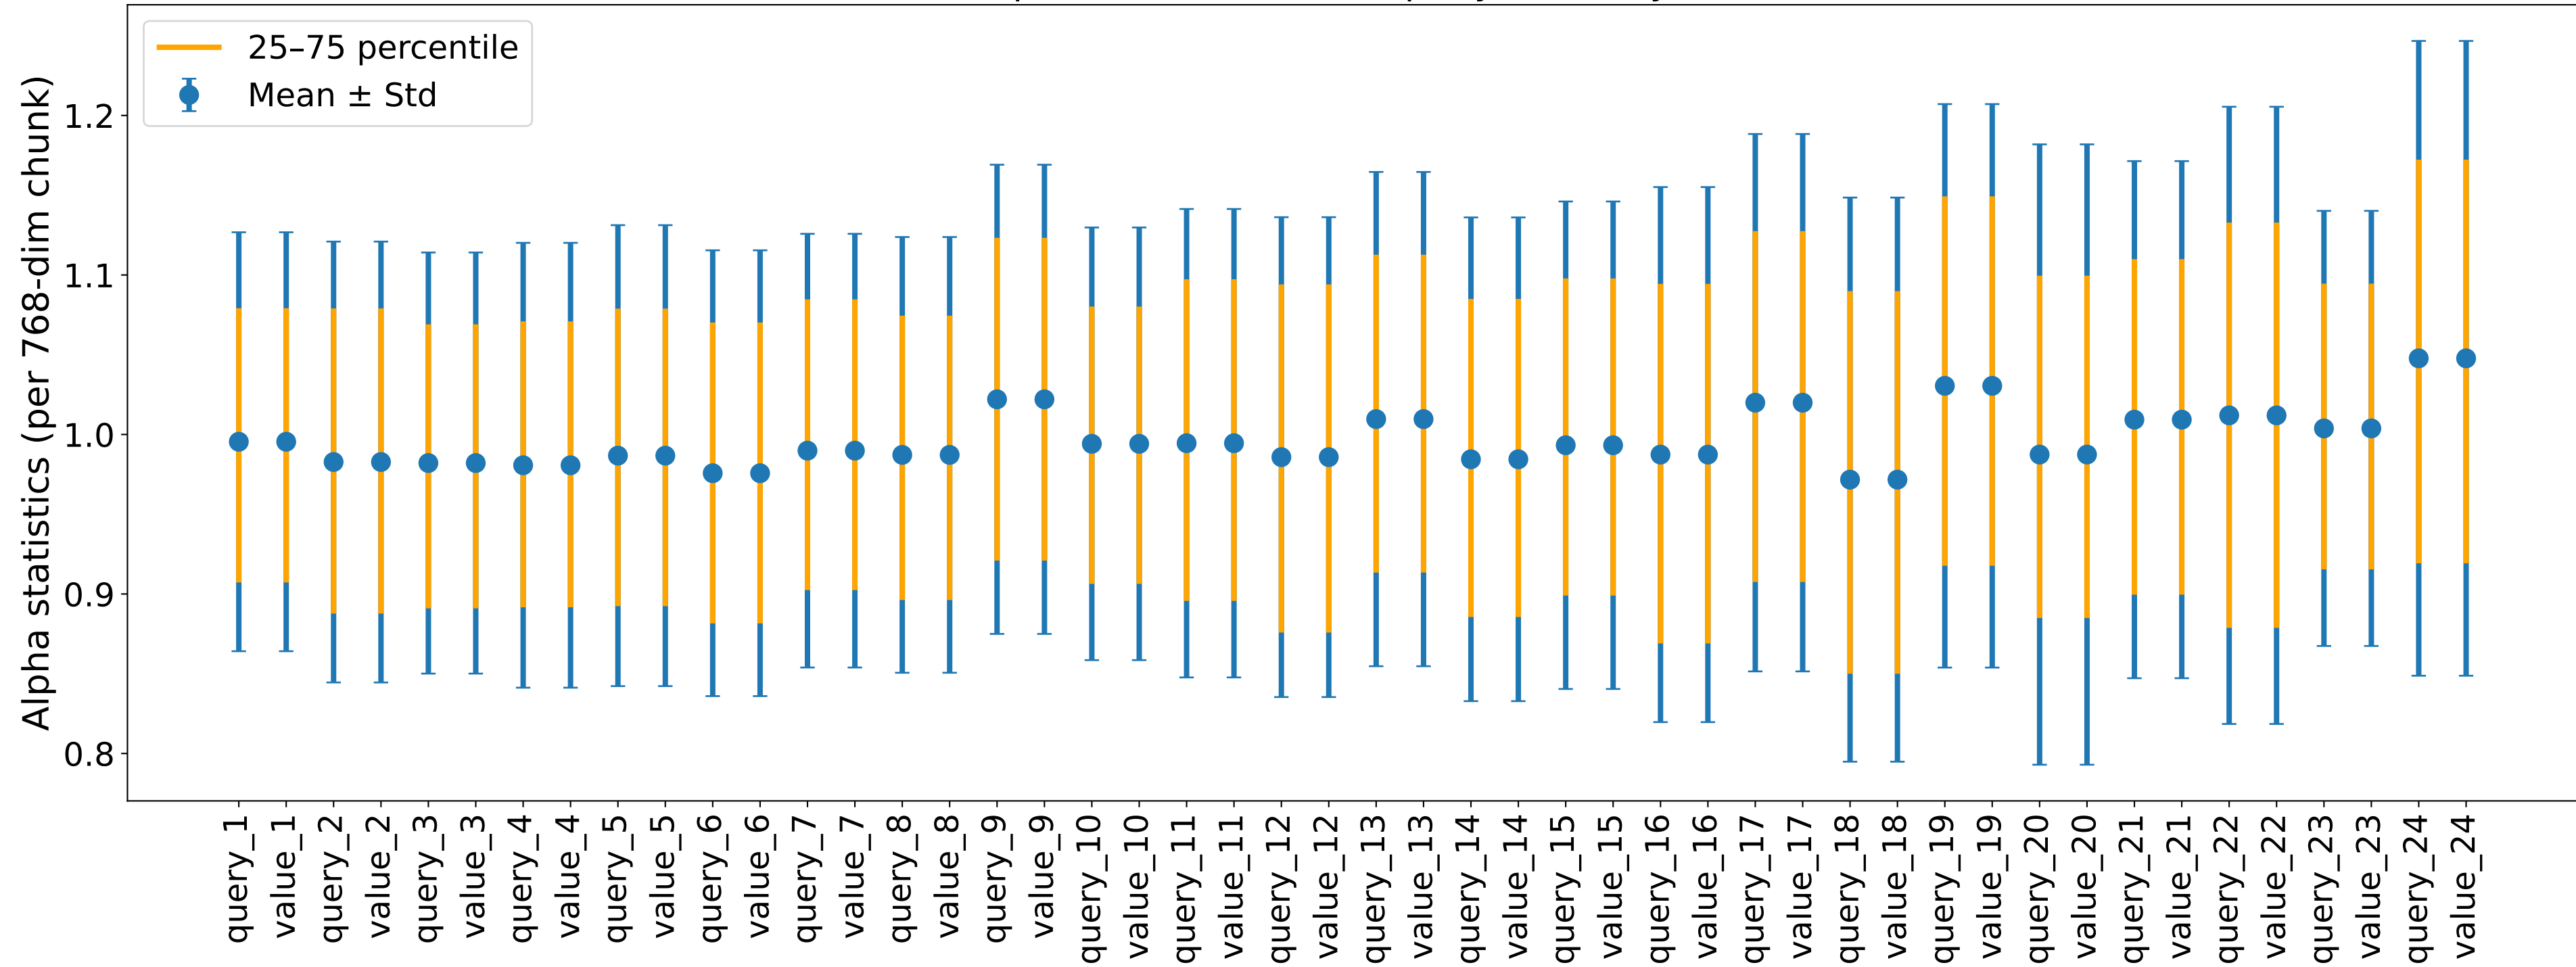

Supplement: supplementary_material [file alpha_statistics_qnli.pdf › Transfer-Learning/results-plot/alpha_statistics_qnli.pdf]

Alpha statistics across query/value layers

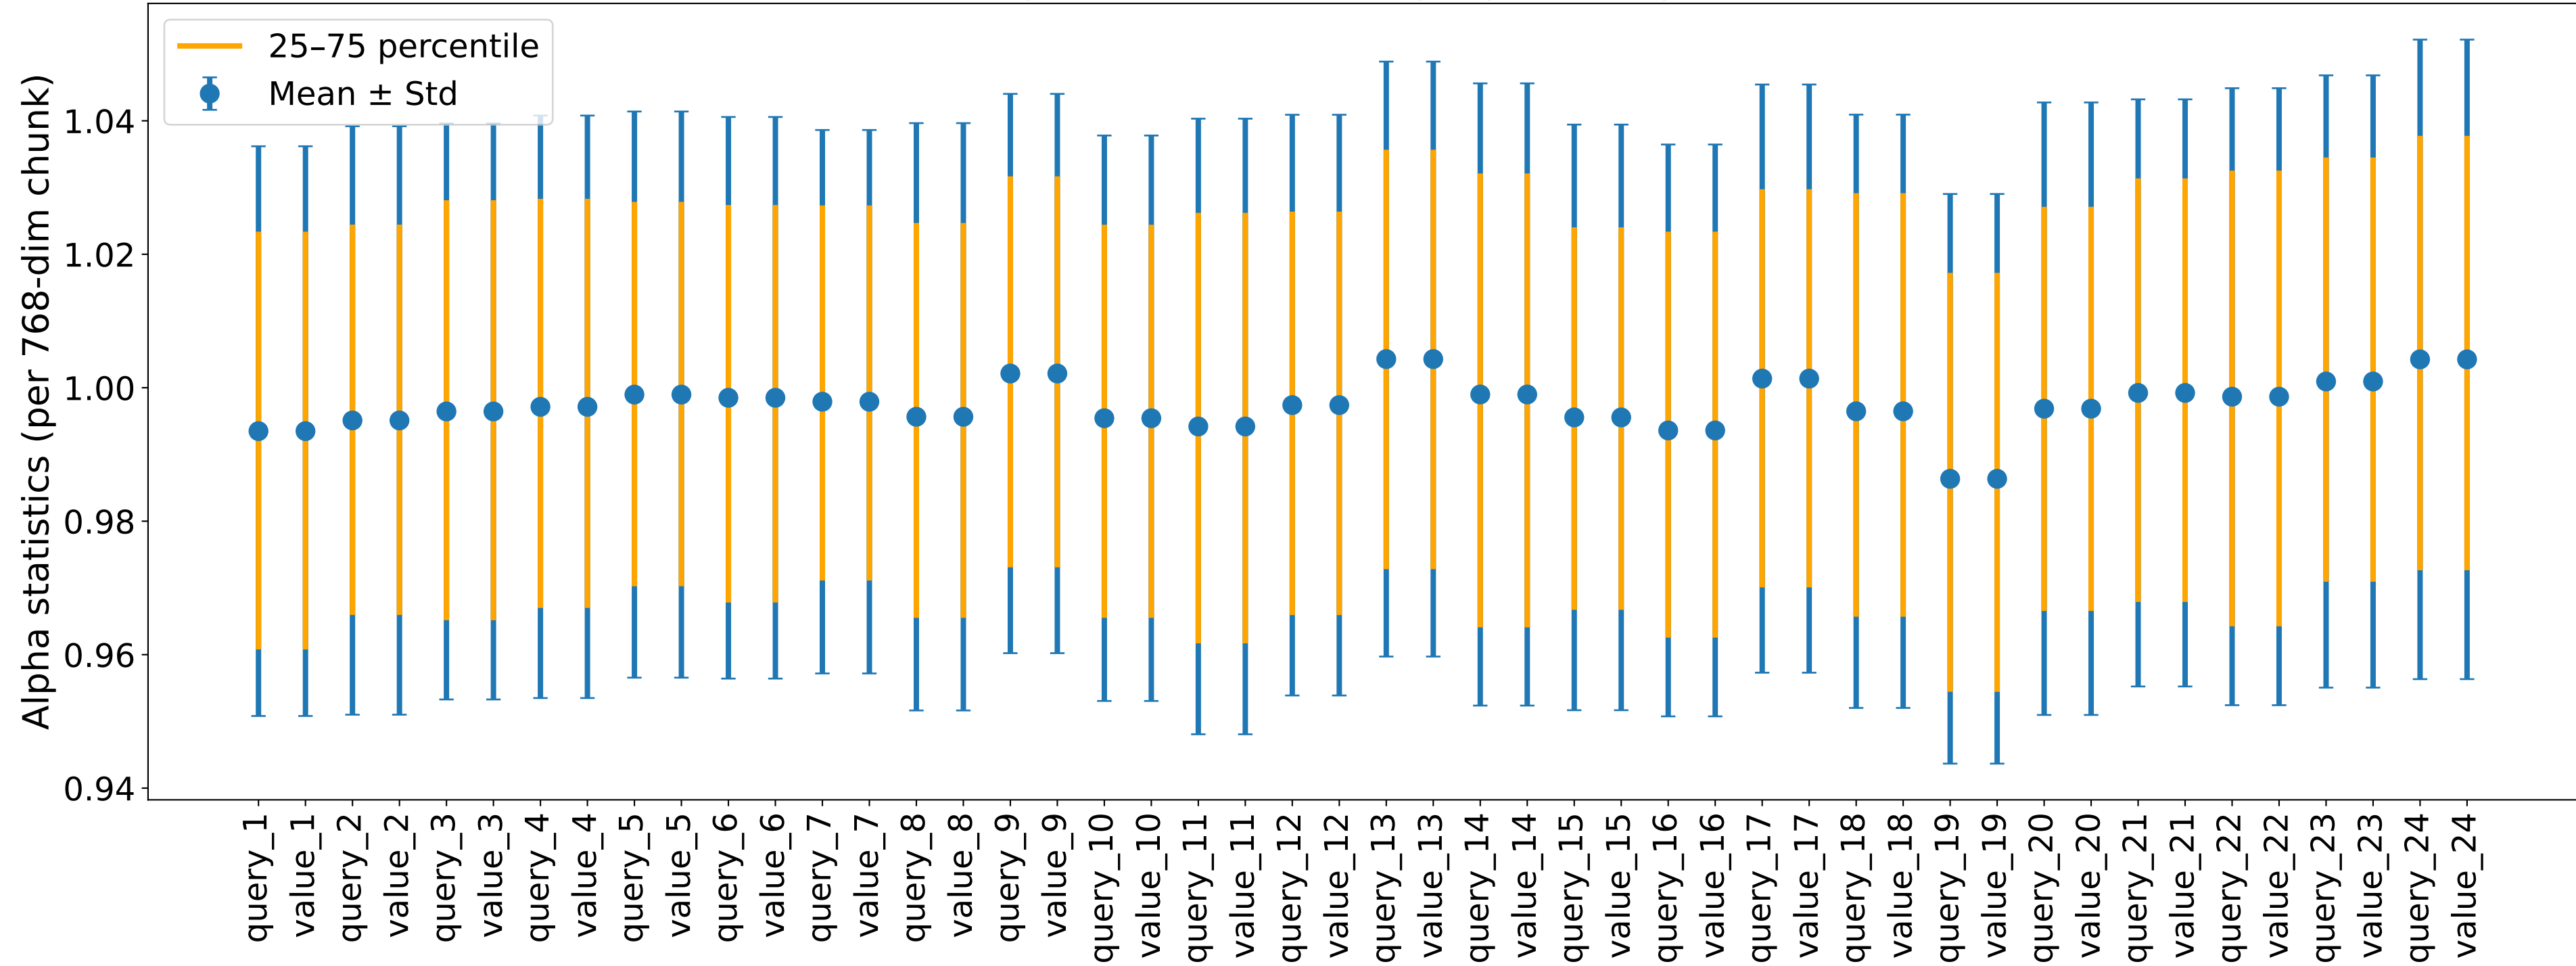

Supplement: supplementary_material [file alpha_statistics_rte.pdf › Transfer-Learning/results-plot/alpha_statistics_rte.pdf]

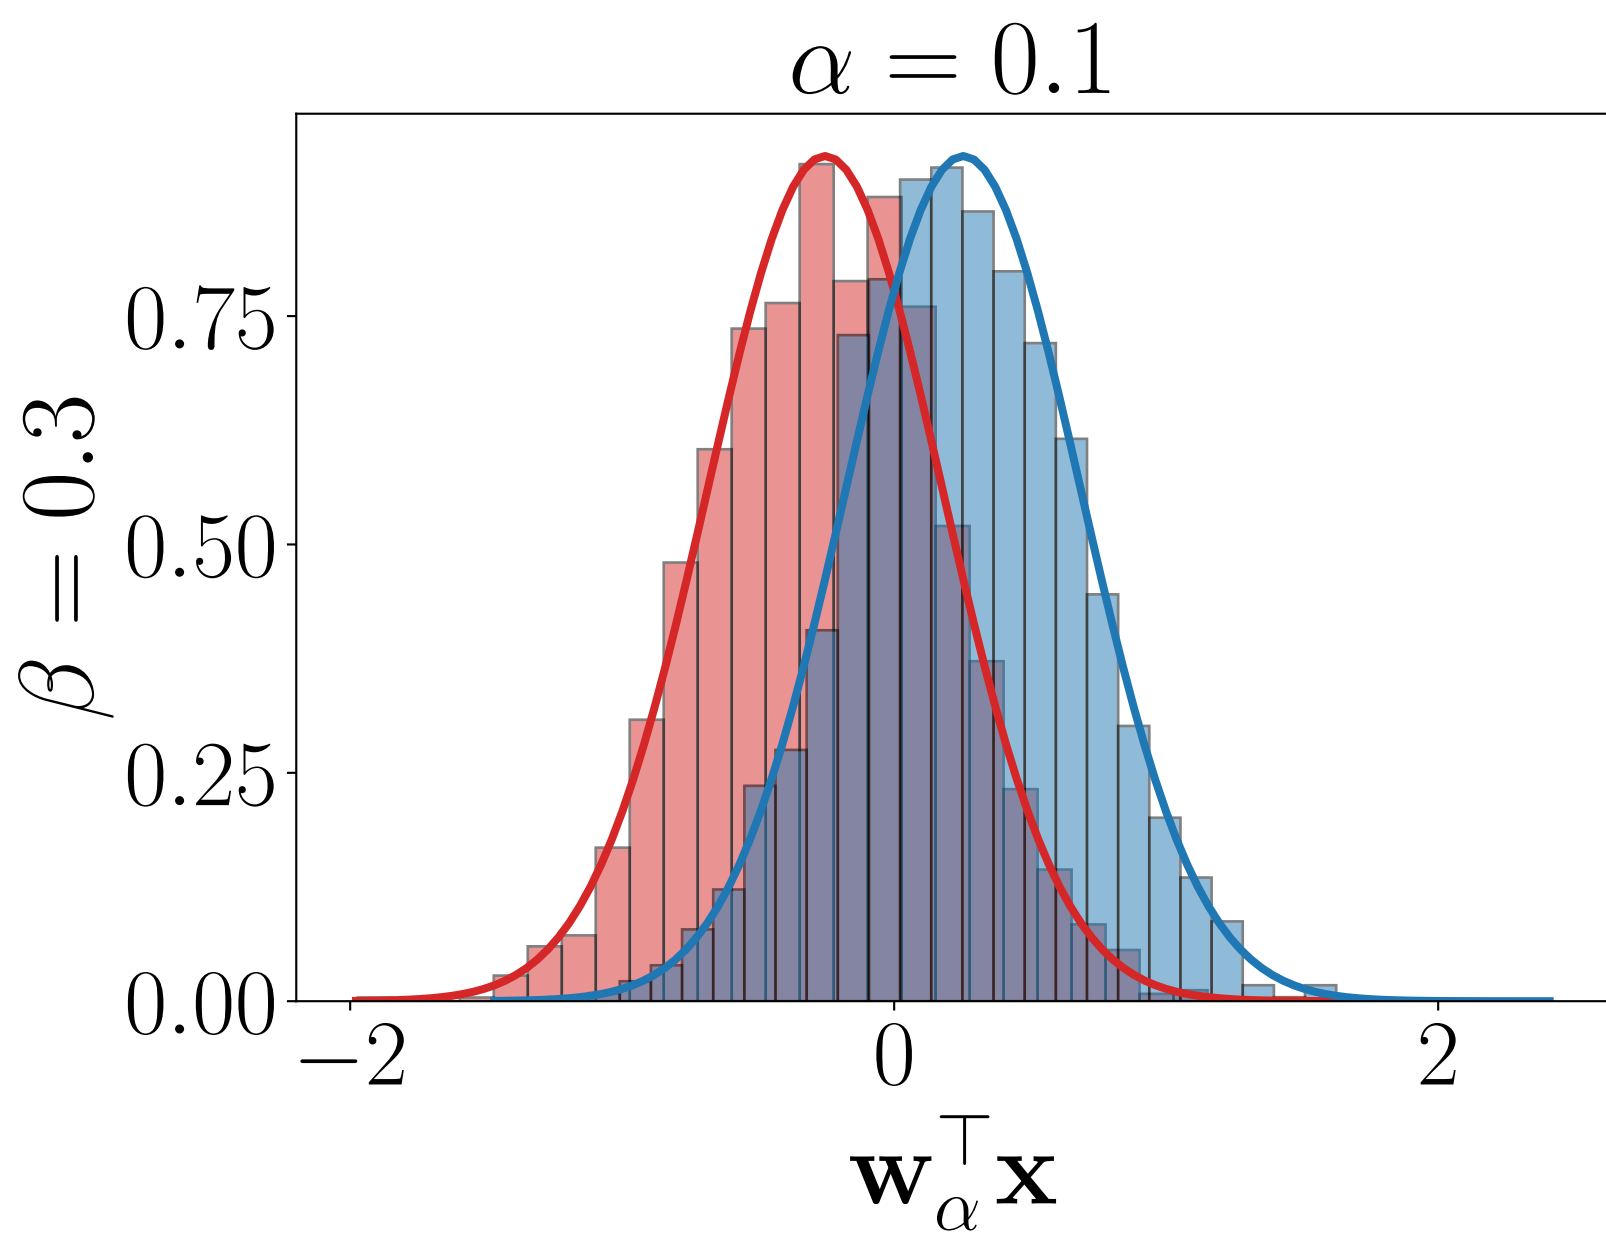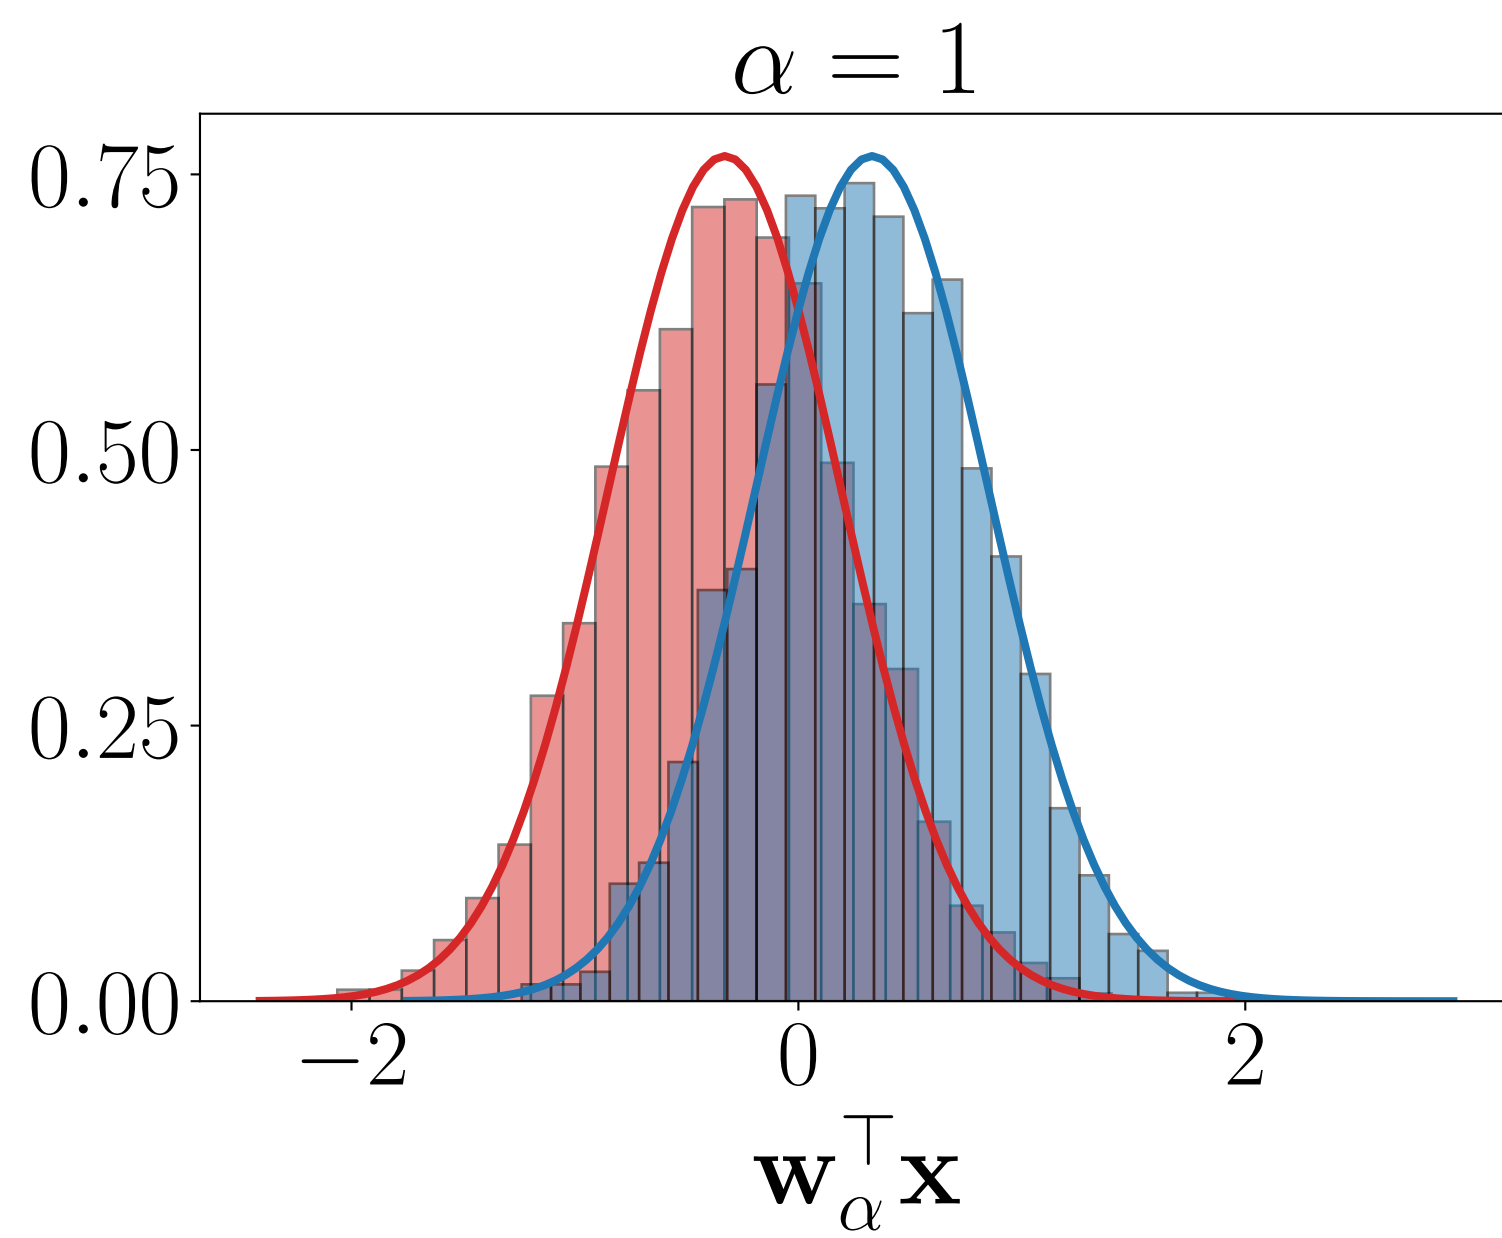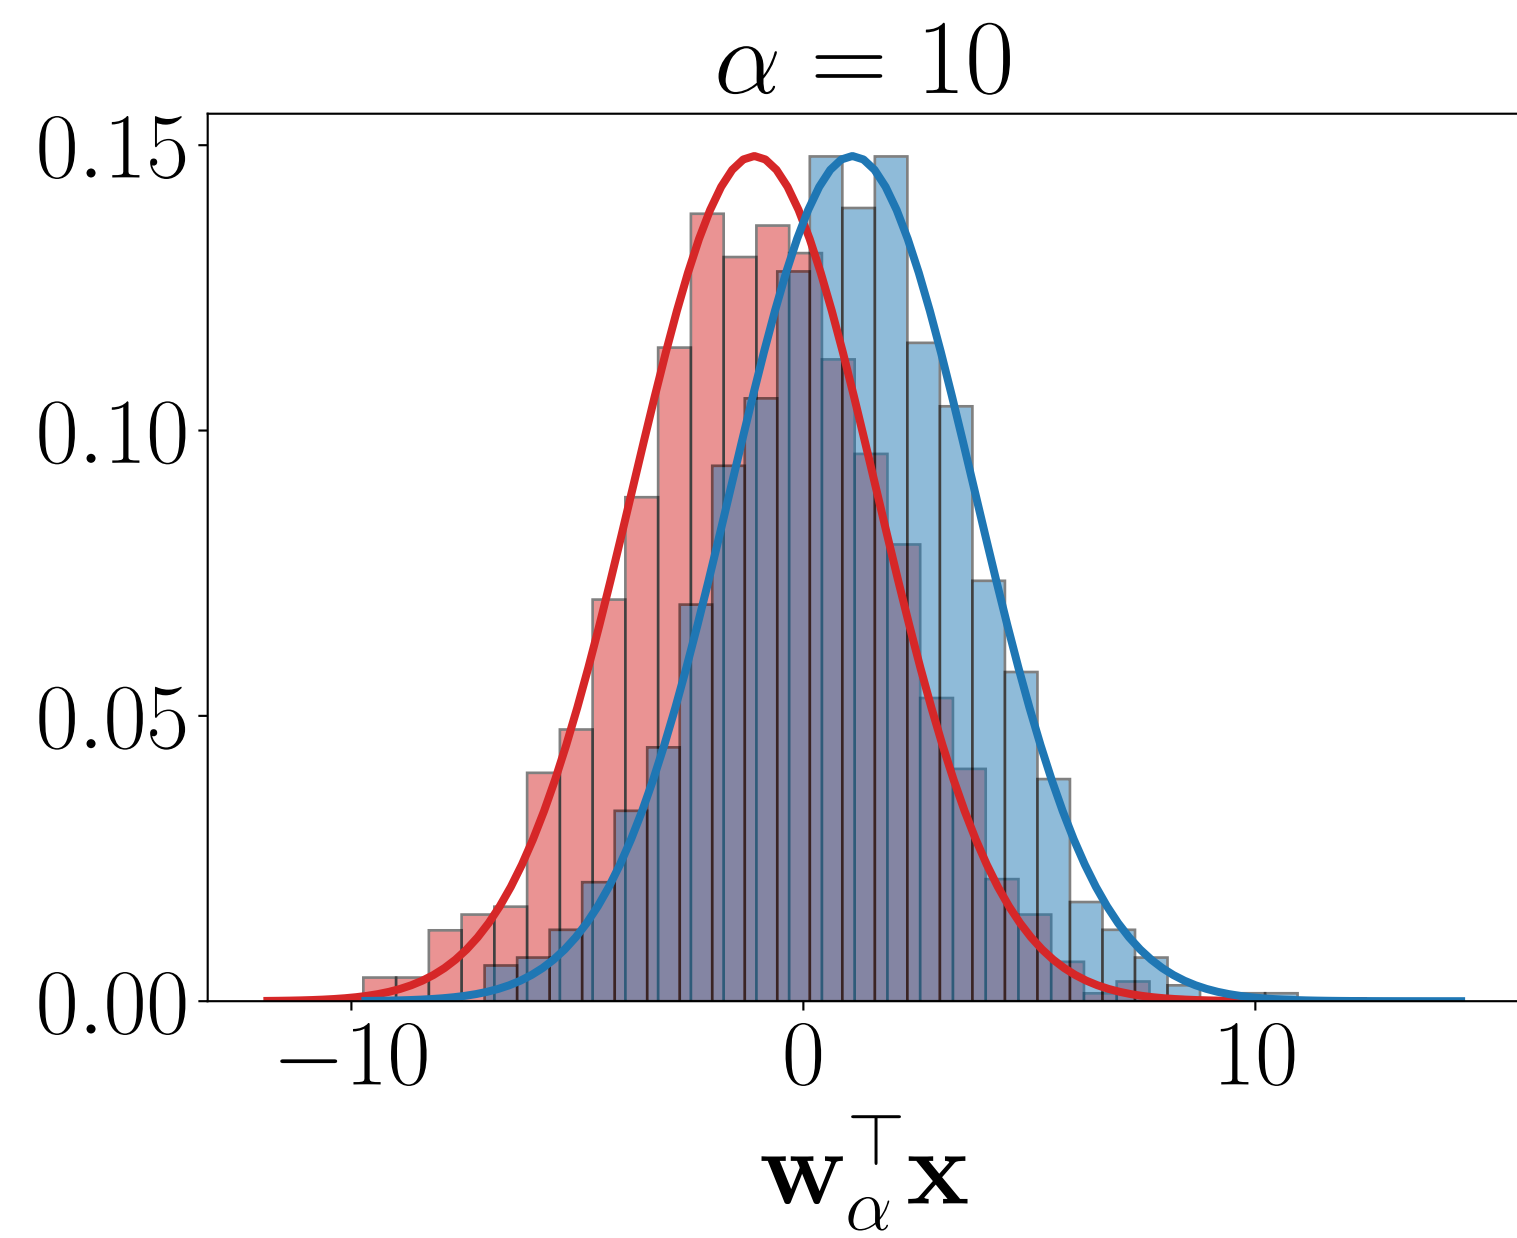

Supplement: supplementary_material [file distribution-N-5000-n-200-p-400-mu-1.5-mu_orth-1-alpha-10-beta-0.3-gamma_pre-1-gamma_ft-1.pdf › Transfer-Learning/results-plot/distribution-N-5000-n-200-p-400-mu-1.5-mu_orth-1-alpha-10-beta-0.3-gamma_pre-1-gamma_ft-1.pdf]

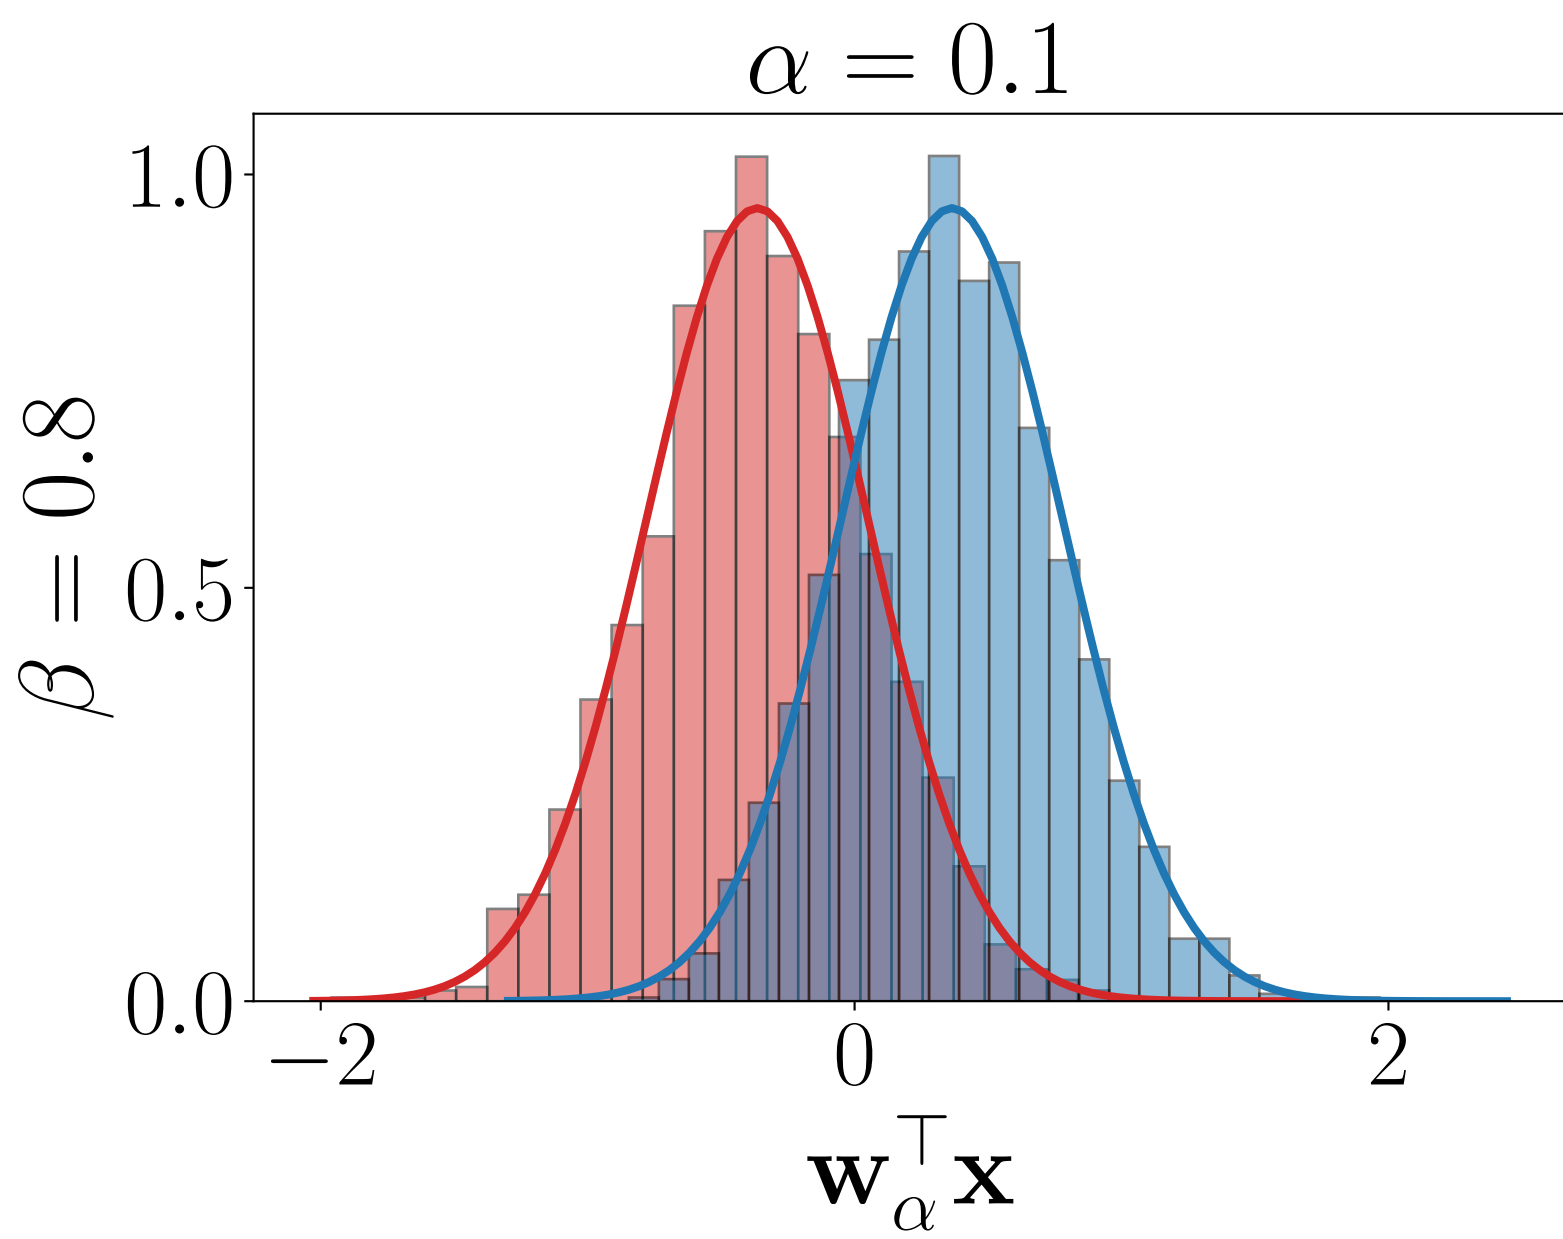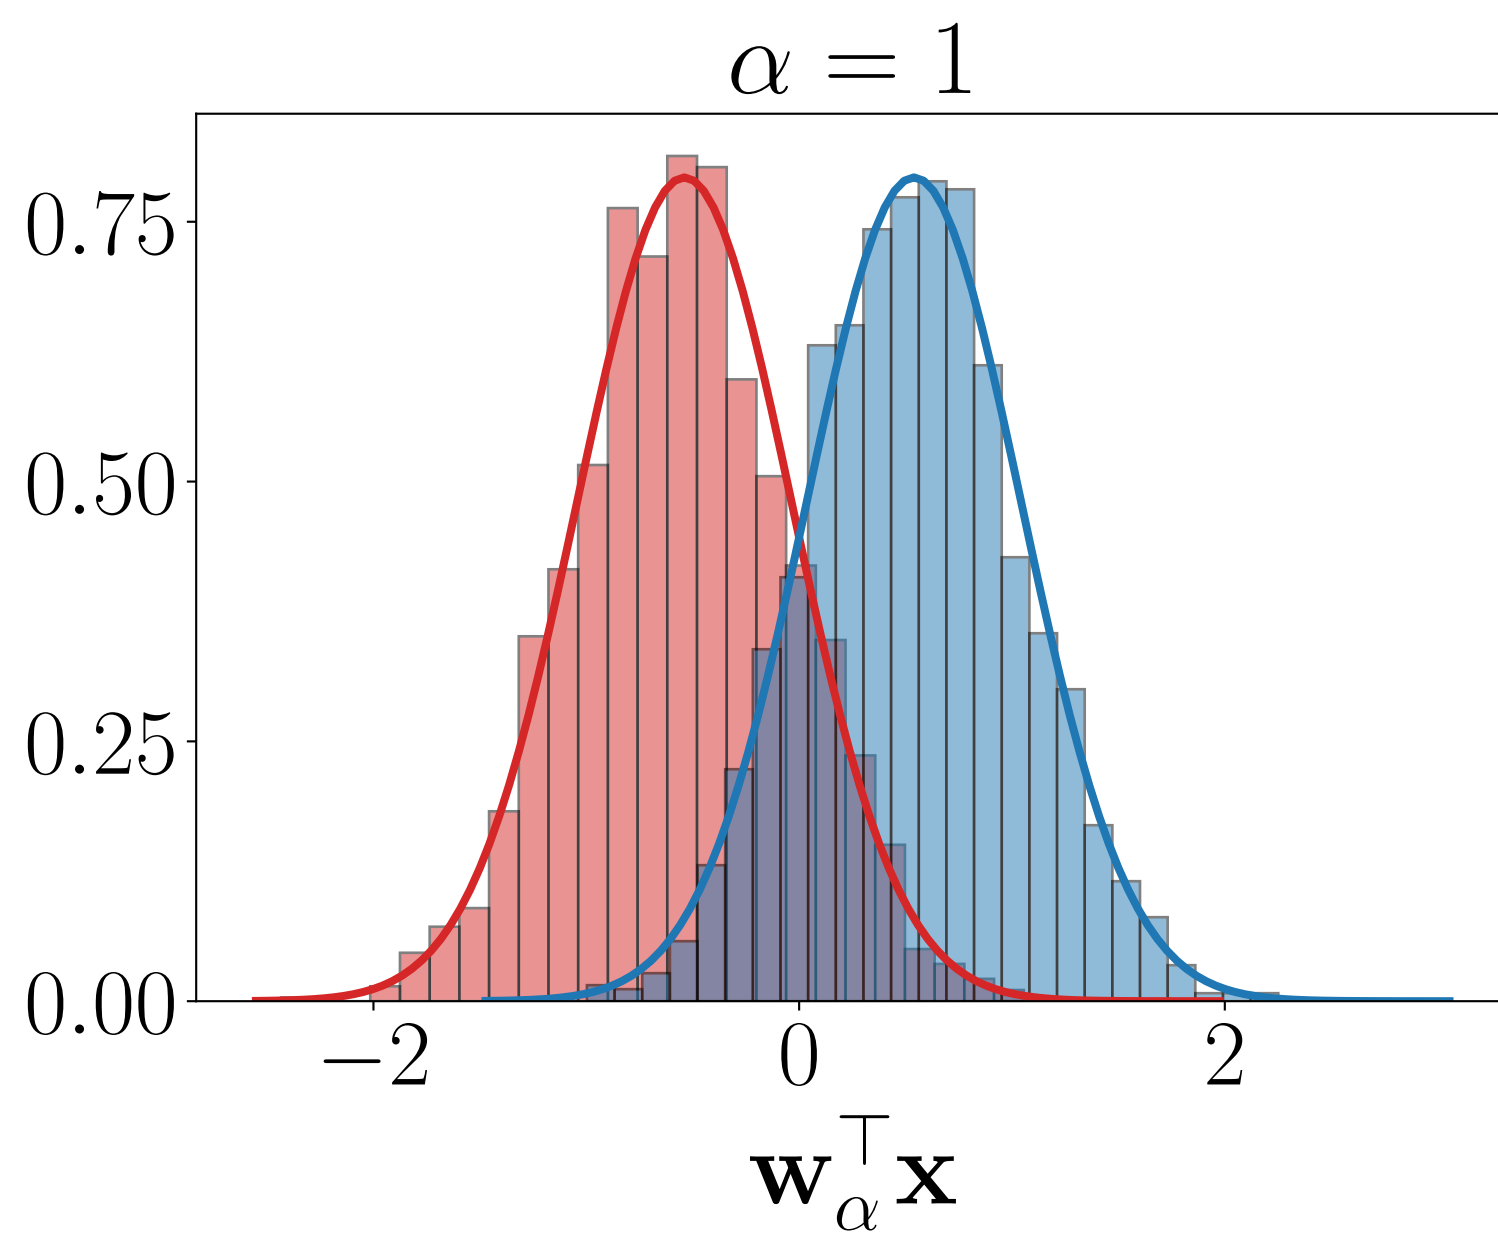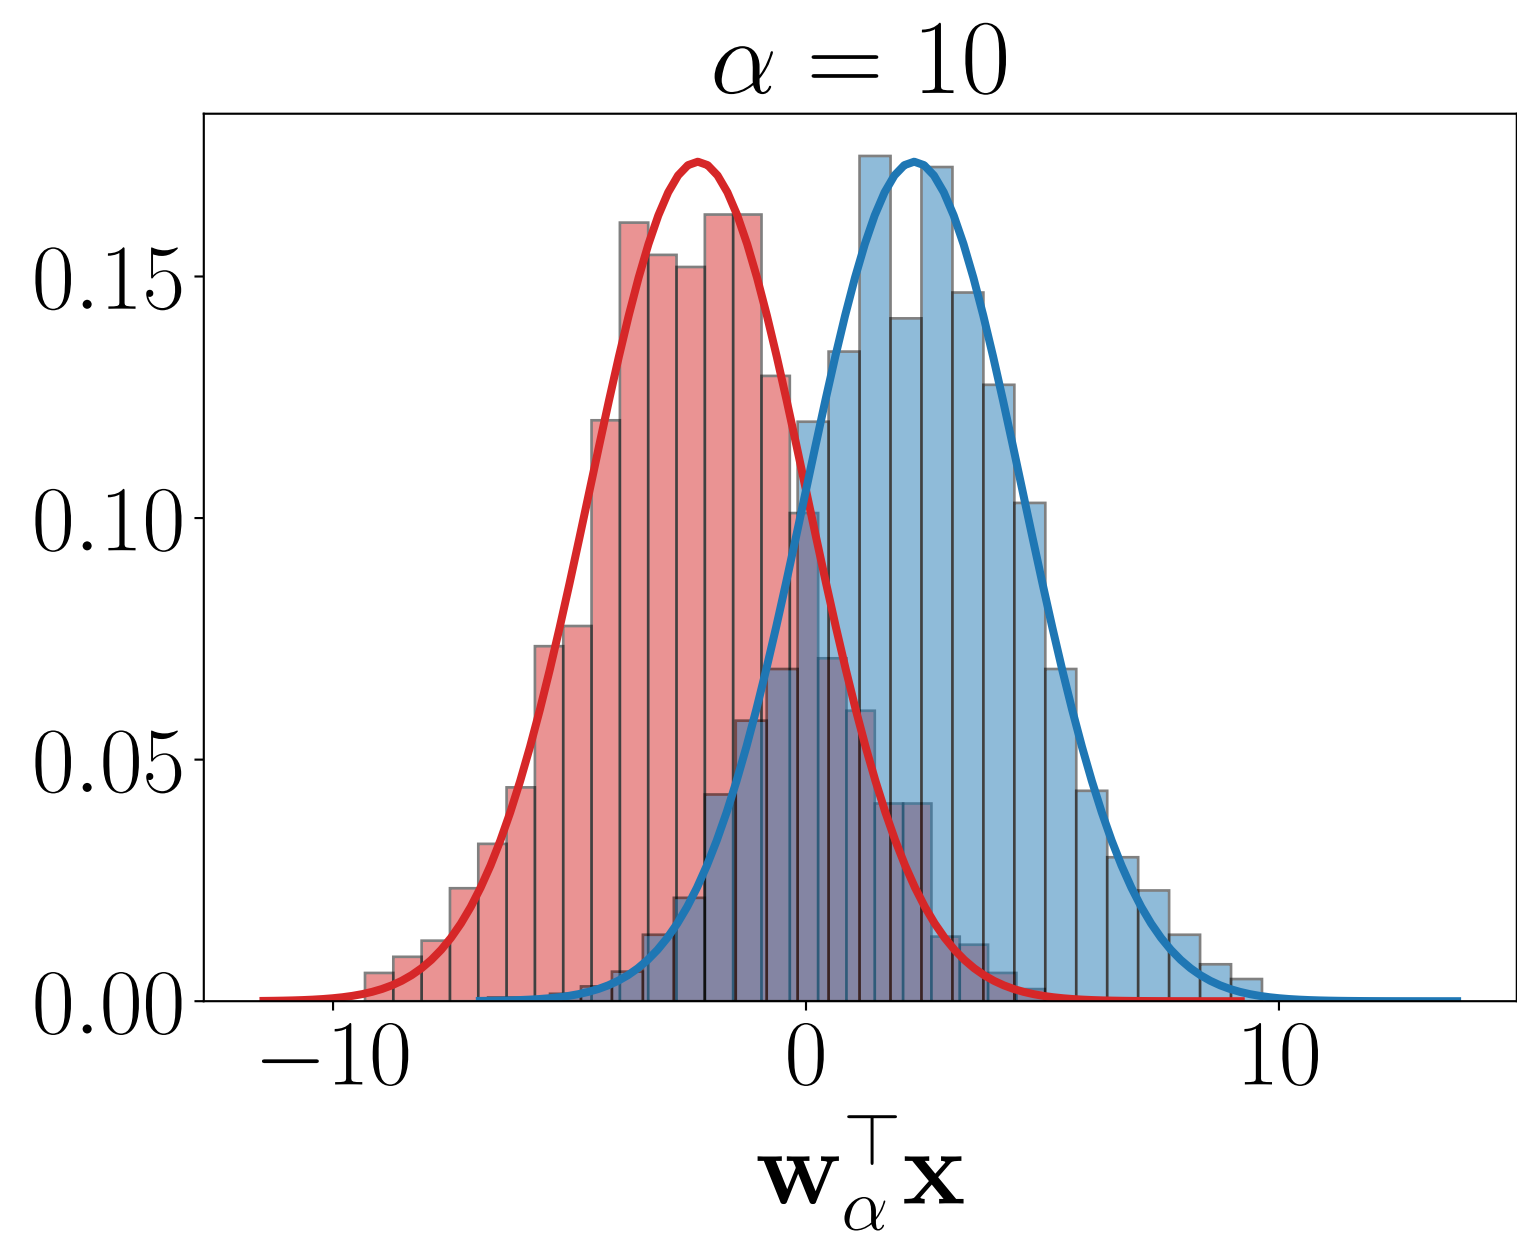

Supplement: supplementary_material [file distribution-N-5000-n-200-p-400-mu-1.5-mu_orth-1-alpha-10-beta-0.8-gamma_pre-1-gamma_ft-1.pdf › Transfer-Learning/results-plot/distribution-N-5000-n-200-p-400-mu-1.5-mu_orth-1-alpha-10-beta-0.8-gamma_pre-1-gamma_ft-1.pdf]

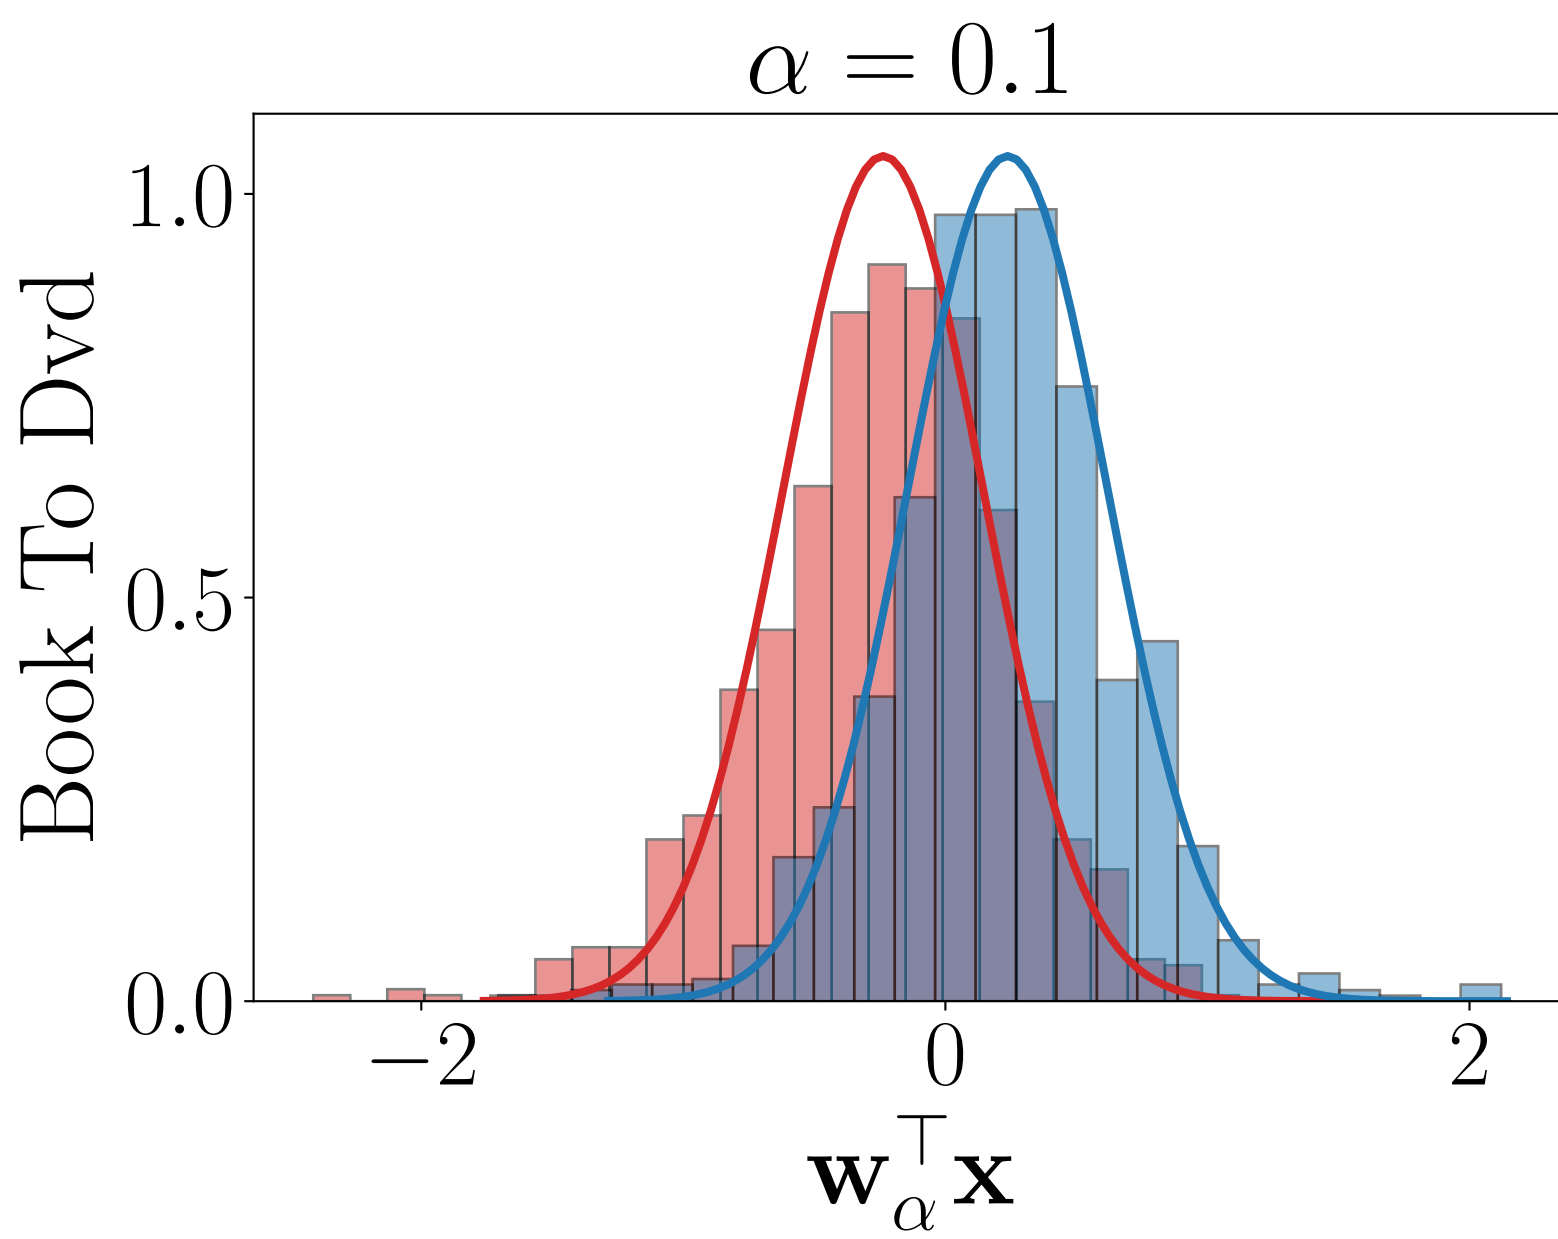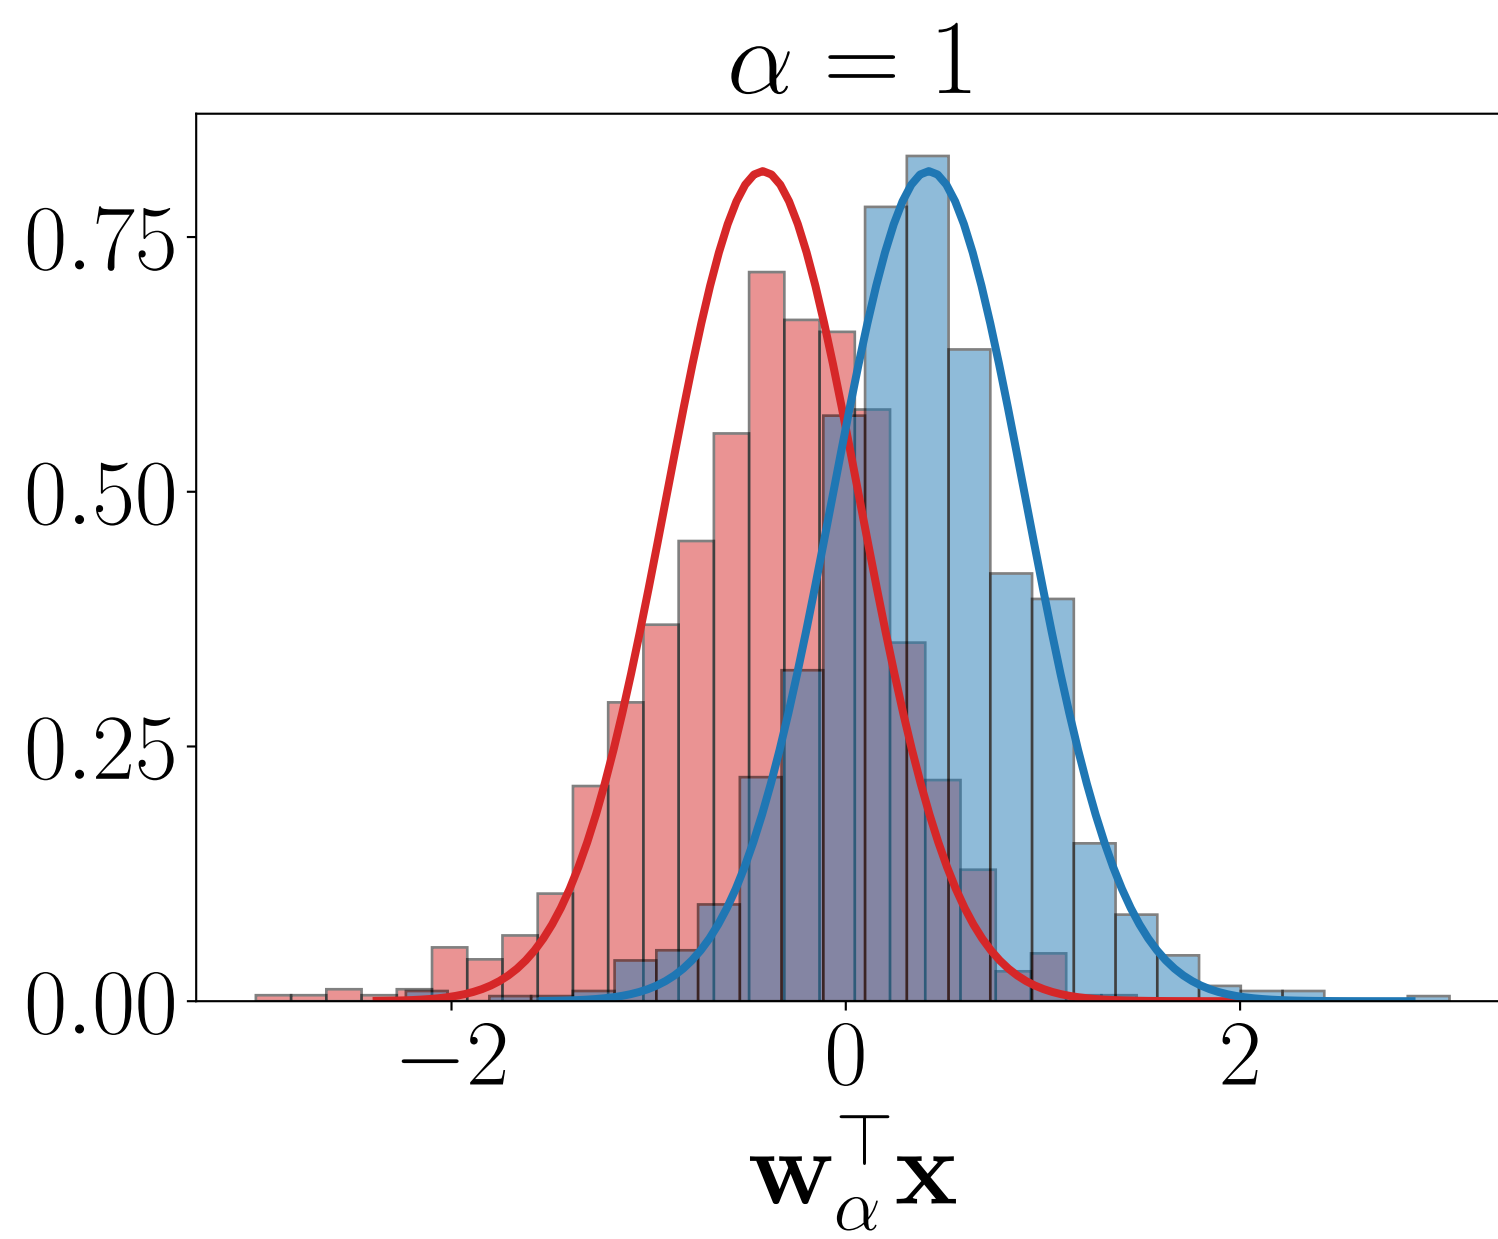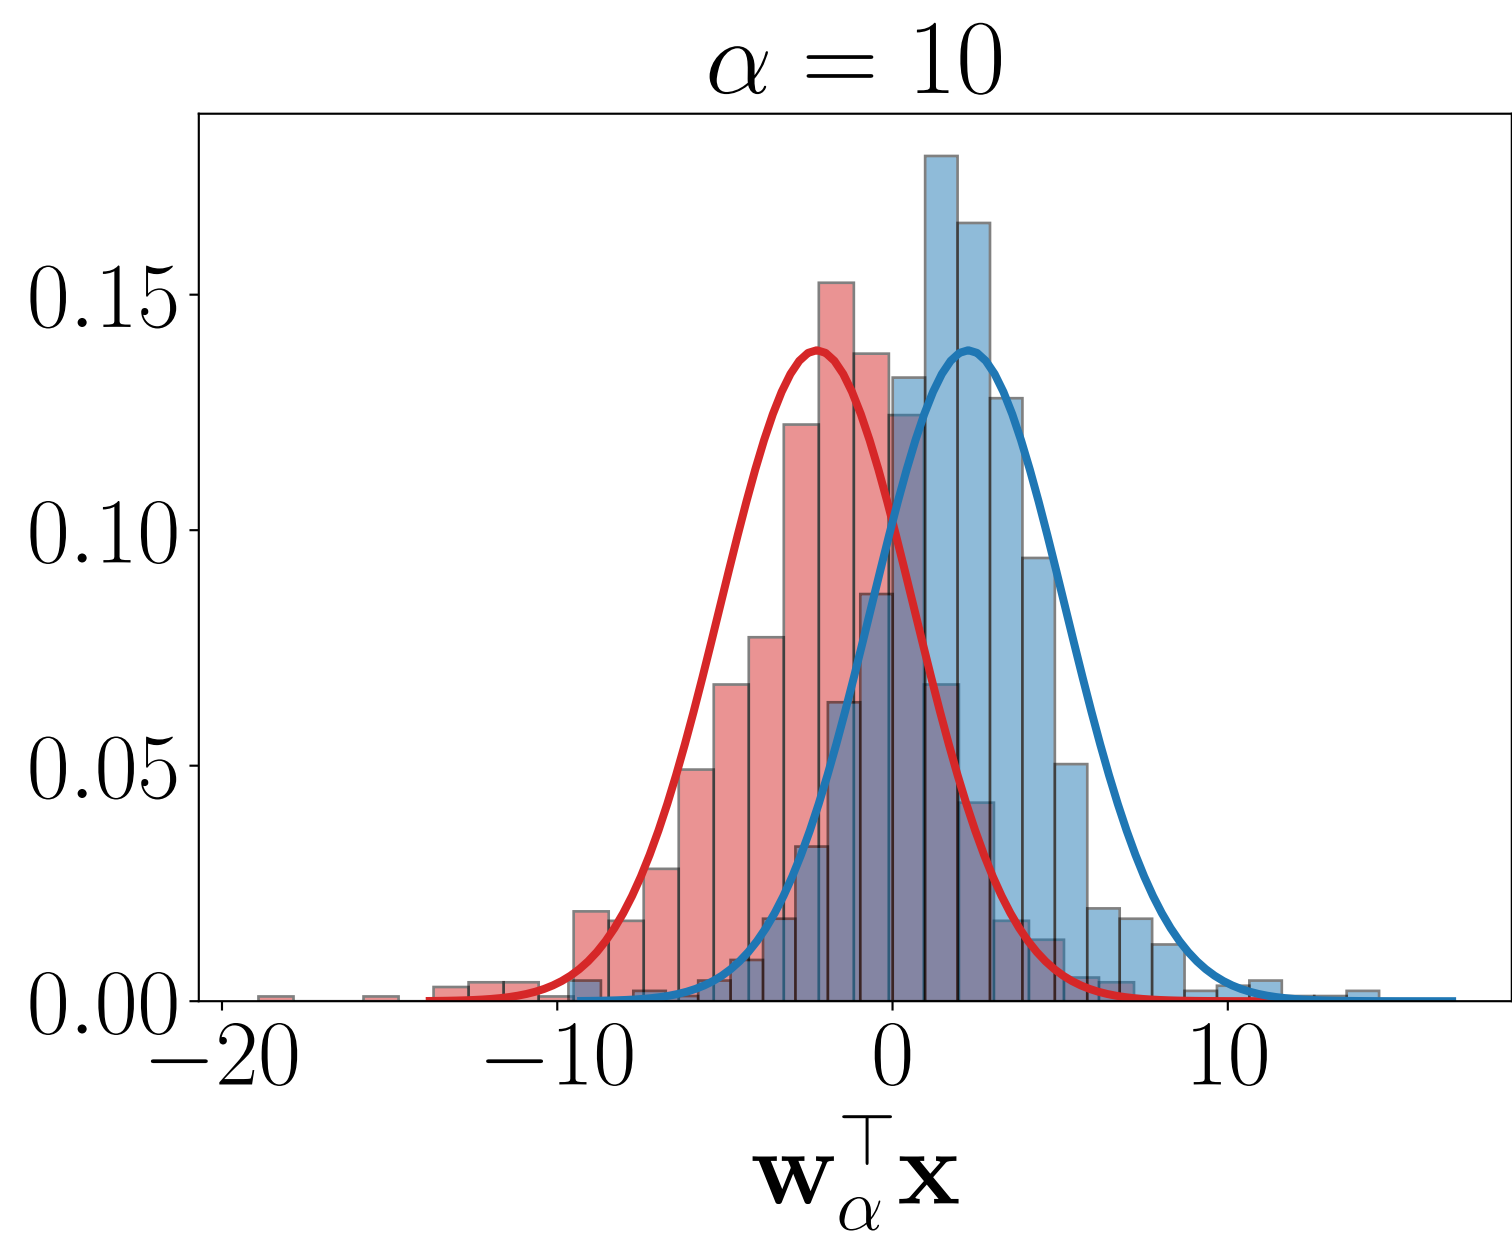

Supplement: supplementary_material [file distribution_real-book-dvd-N-2000-n-100-p-400-alpha-10-mu-1.2-mu_orth-1.22-beta-0.8-gamma_pre-1-gamma_ft-1.pdf › Transfer-Learning/results-plot/distribution_real-book-dvd-N-2000-n-100-p-400-alpha-10-mu-1.2-mu_orth-1.22-beta-0.8-gamma_pre-1-gamma_ft-1.pdf]

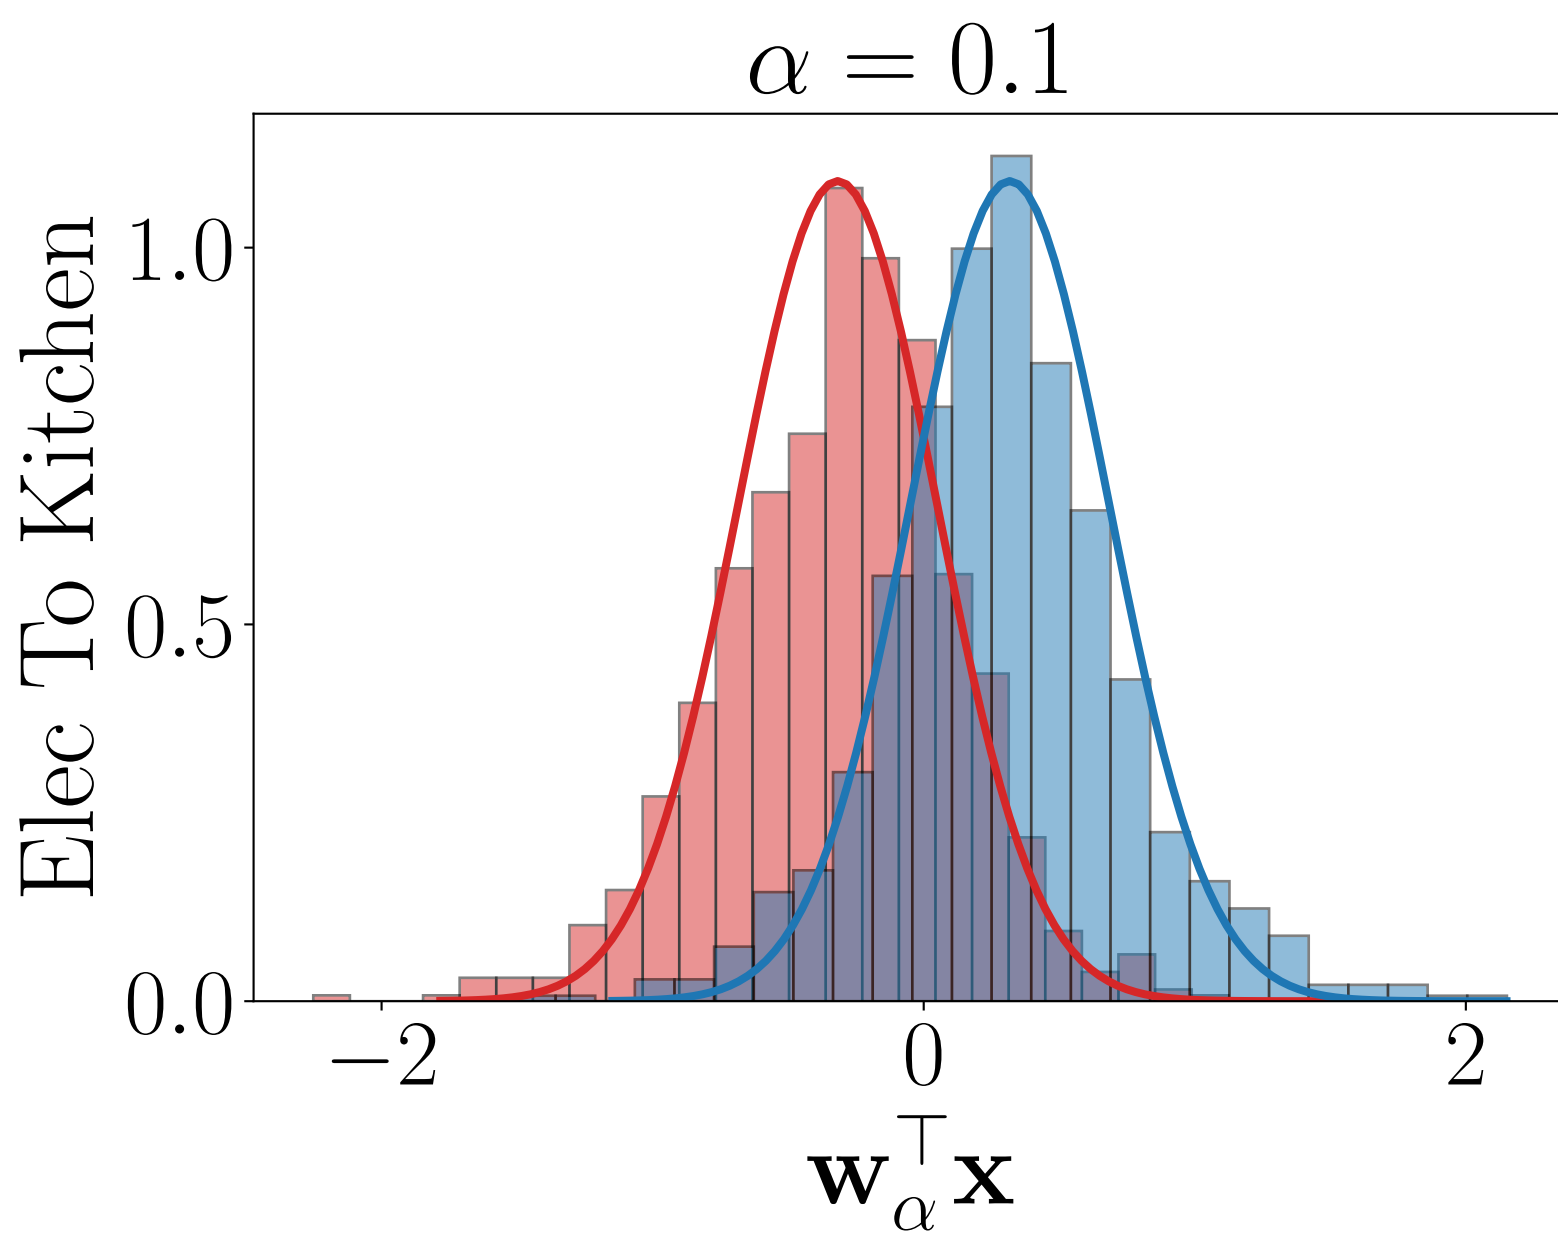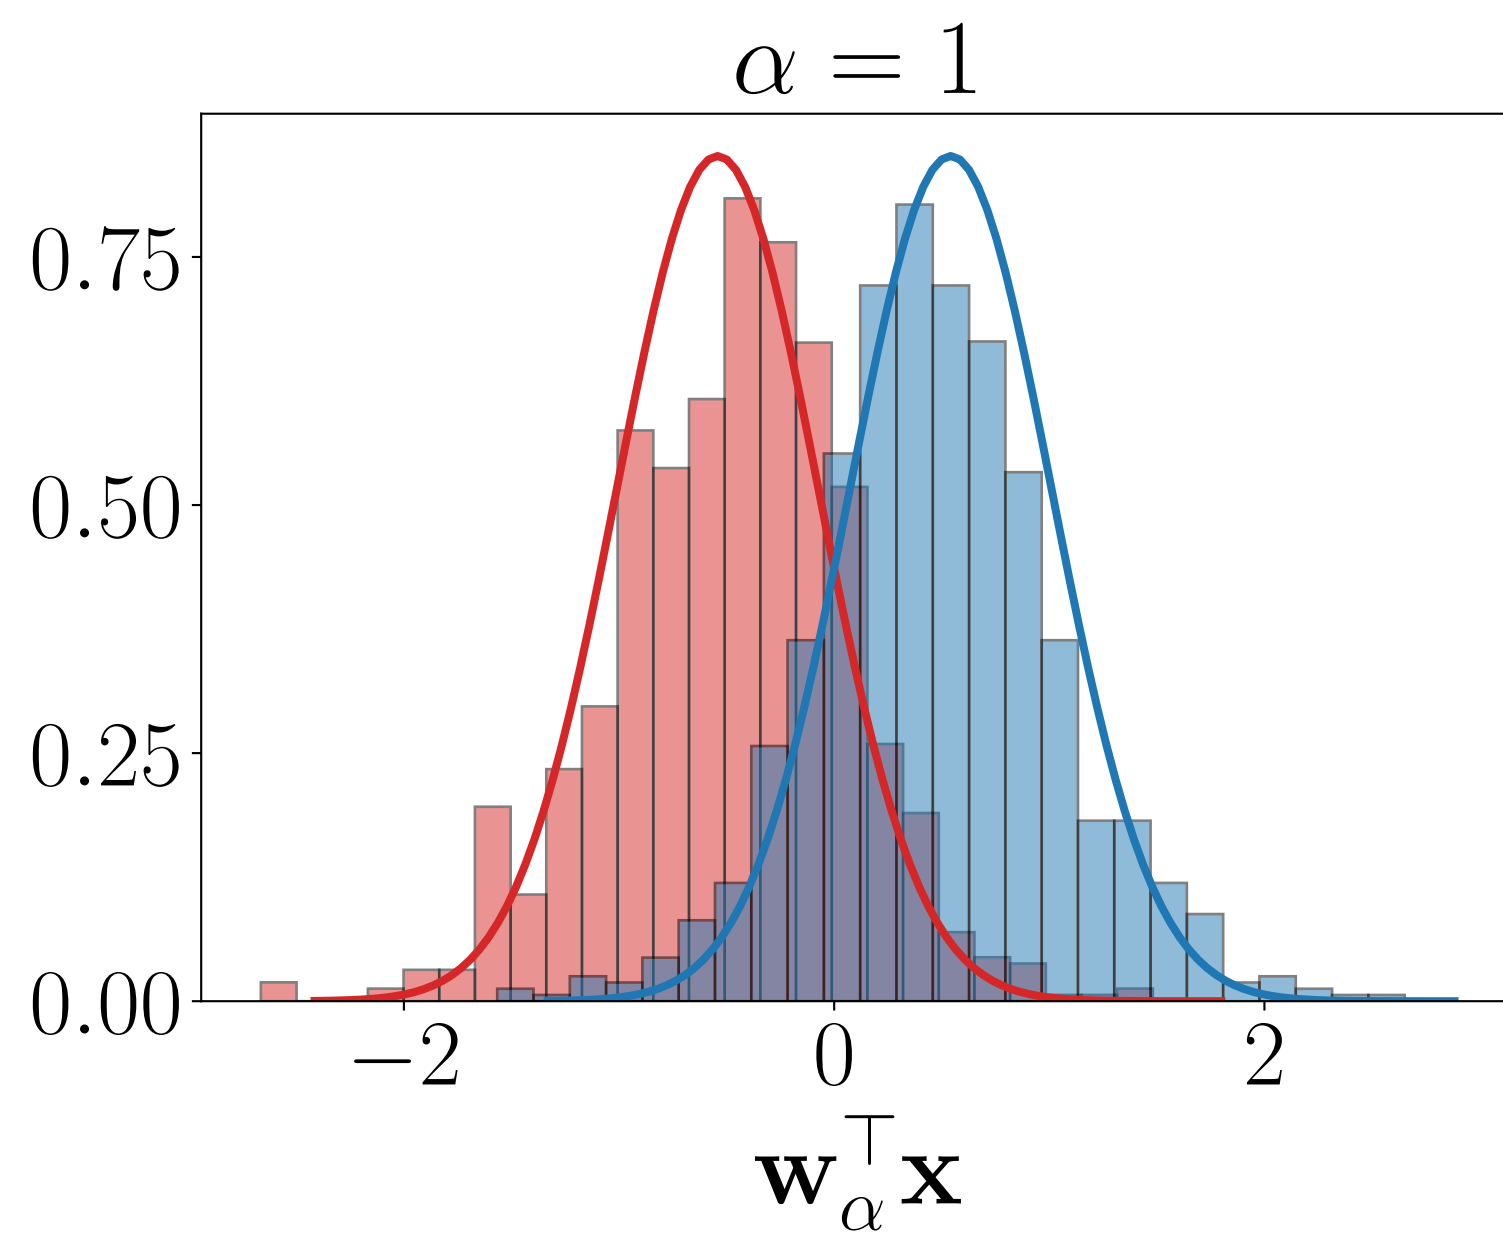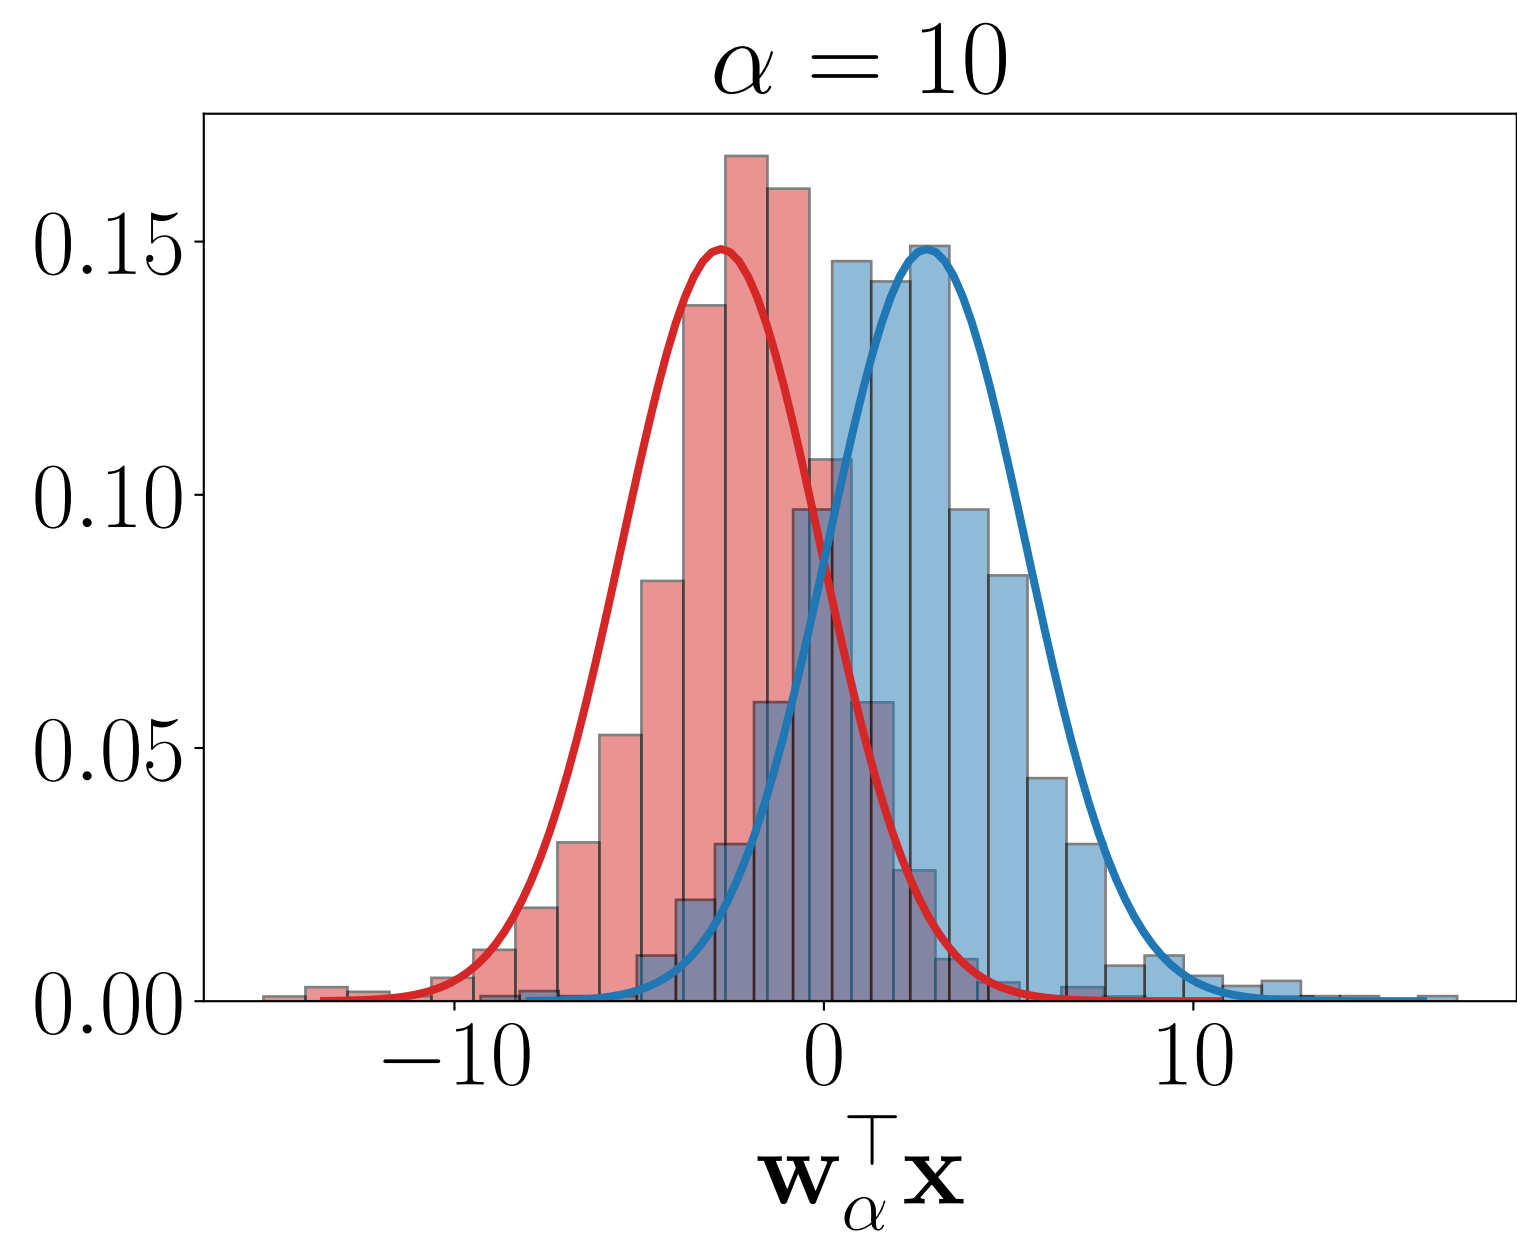

Supplement: supplementary_material [file distribution_real-elec-kitchen-N-2000-n-100-p-400-alpha-10-mu-1.41-mu_orth-1.69-beta-0.9-gamma_pre-1-gamma_ft-1.pdf › Transfer-Learning/results-plot/distribution_real-elec-kitchen-N-2000-n-100-p-400-alpha-10-mu-1.41-mu_orth-1.69-beta-0.9-gamma_pre-1-gamma_ft-1.pdf]

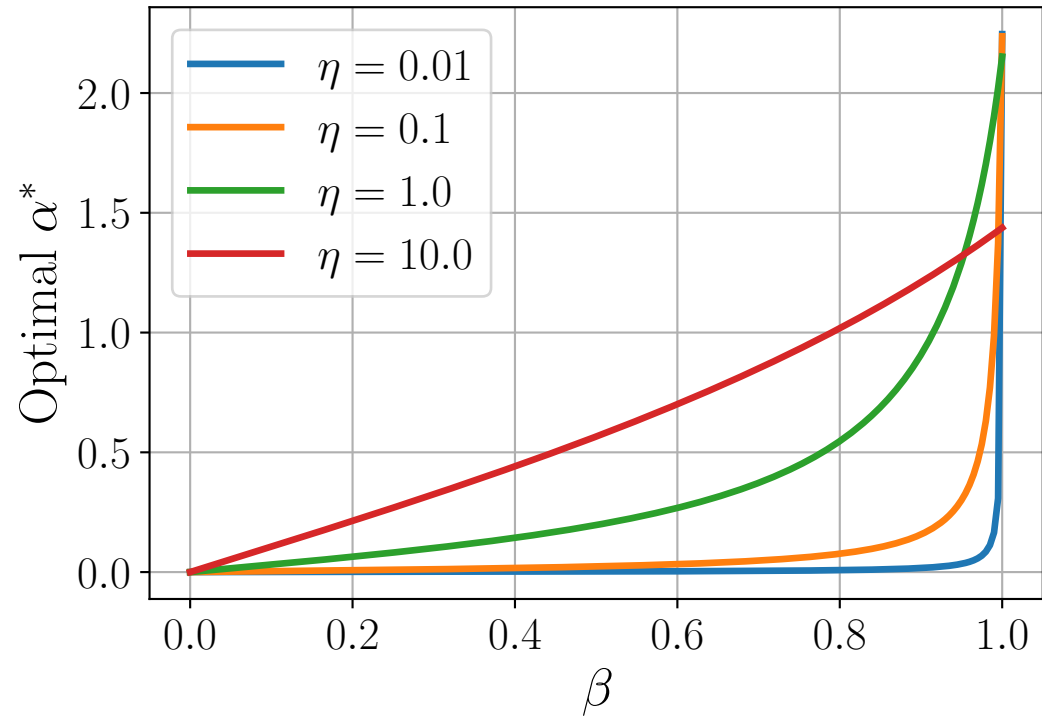

Supplement: supplementary_material [file optimal-alpha-ridge-N-2000-n-200-gamma_pre-0.1-gamma_ft-5.pdf › Transfer-Learning/results-plot/optimal-alpha-ridge-N-2000-n-200-gamma_pre-0.1-gamma_ft-5.pdf]

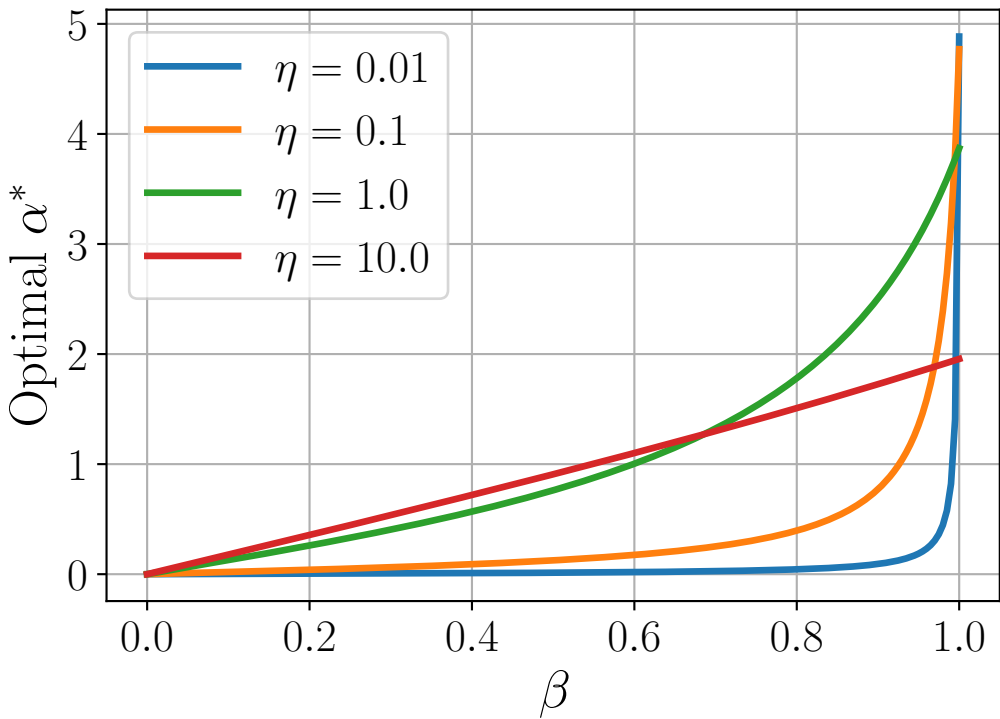

Supplement: supplementary_material [file optimal-alpha-ridge-N-2000-n-200-gamma_pre-1-gamma_ft-1.pdf › Transfer-Learning/results-plot/optimal-alpha-ridge-N-2000-n-200-gamma_pre-1-gamma_ft-1.pdf]

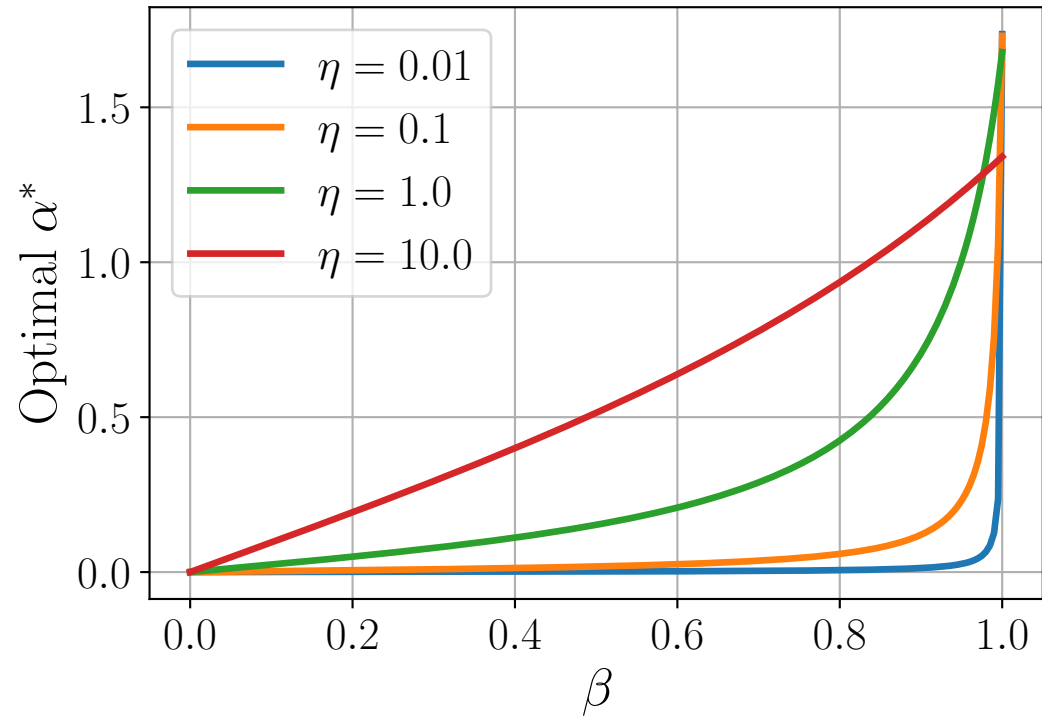

Supplement: supplementary_material [file optimal-alpha-ridge-N-2000-n-200-gamma_pre-1-gamma_ft-10.pdf › Transfer-Learning/results-plot/optimal-alpha-ridge-N-2000-n-200-gamma_pre-1-gamma_ft-10.pdf]

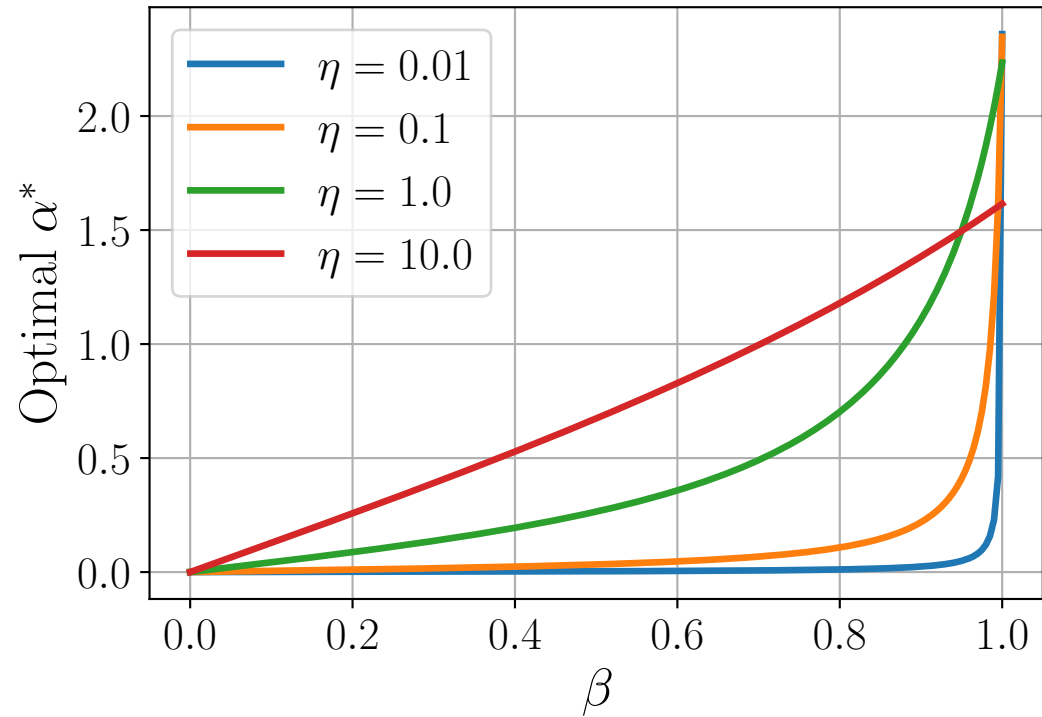

Supplement: supplementary_material [file optimal-alpha-ridge-N-2000-n-200-gamma_pre-1-gamma_ft-5.pdf › Transfer-Learning/results-plot/optimal-alpha-ridge-N-2000-n-200-gamma_pre-1-gamma_ft-5.pdf]

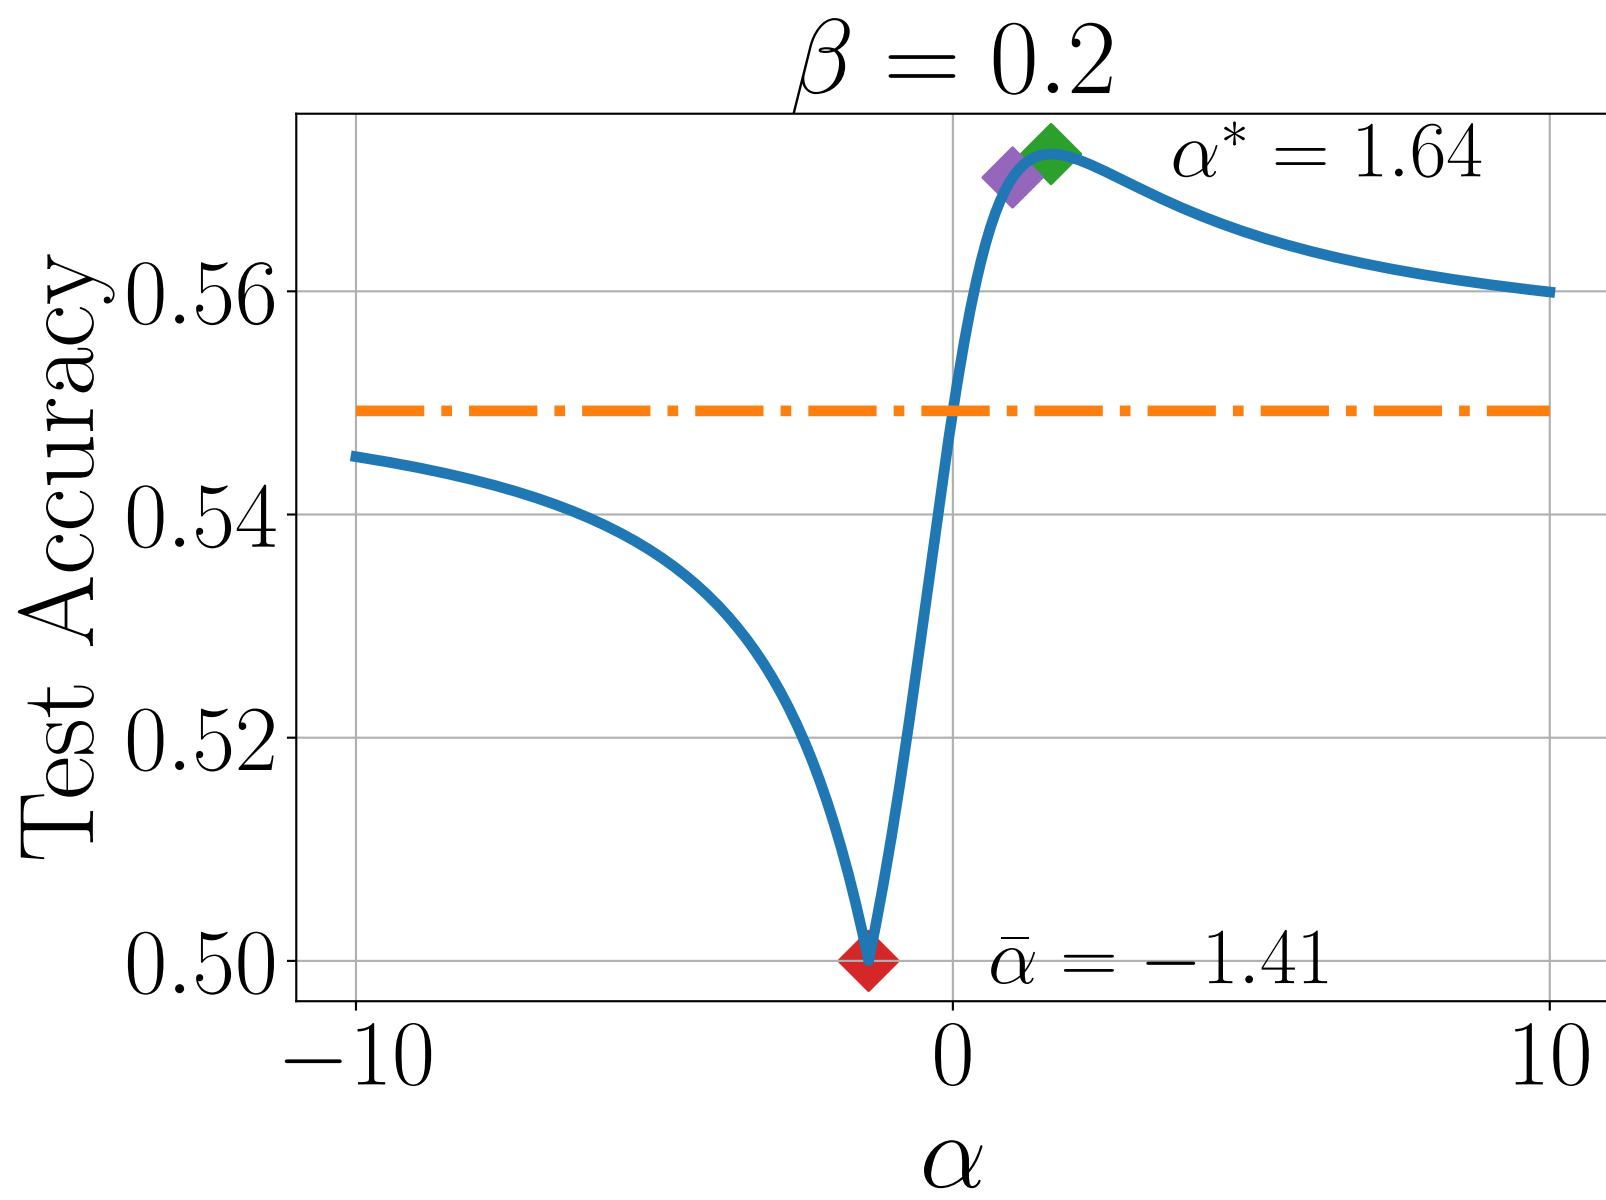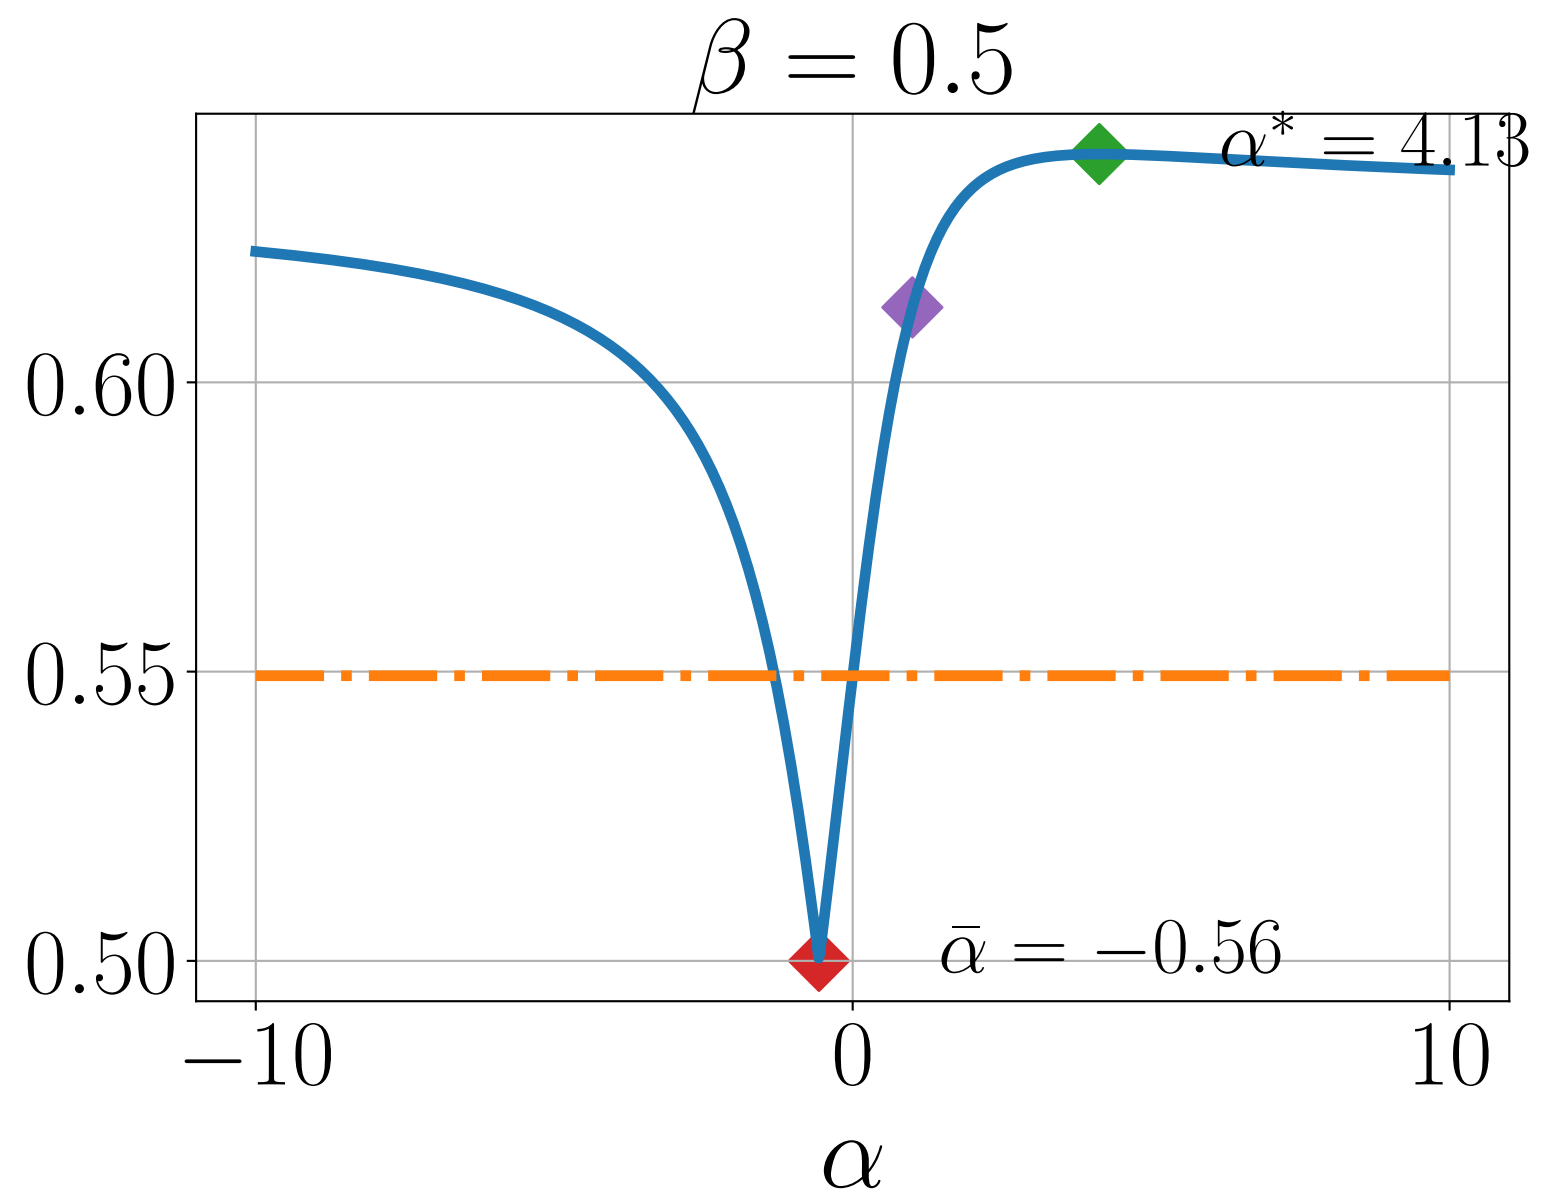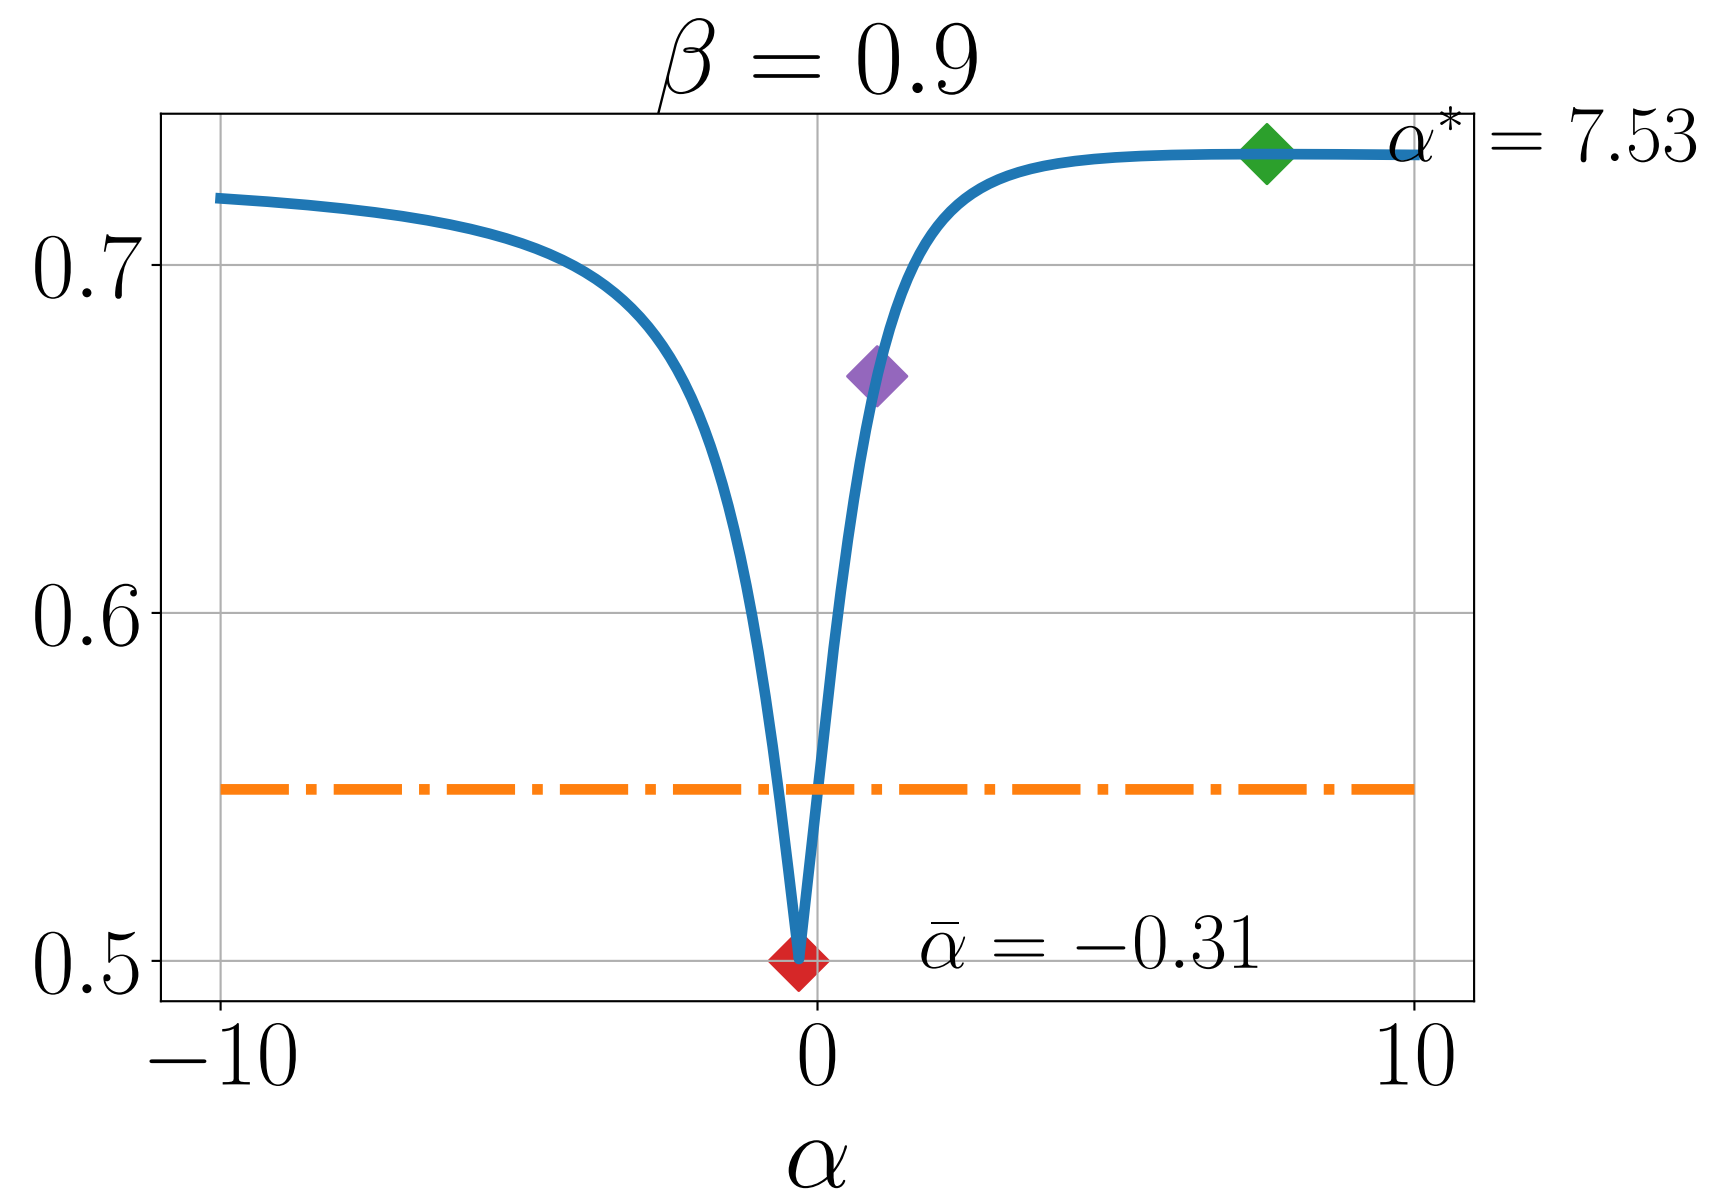

Supplement: supplementary_material [file optimize-N-5000-n-40-p-1000-mu-0.8-mu_orth-0.8-gamma_pre-5-gamma_ft-0.1.pdf › Transfer-Learning/results-plot/optimize-N-5000-n-40-p-1000-mu-0.8-mu_orth-0.8-gamma_pre-5-gamma_ft-0.1.pdf]

MNLI benchmark

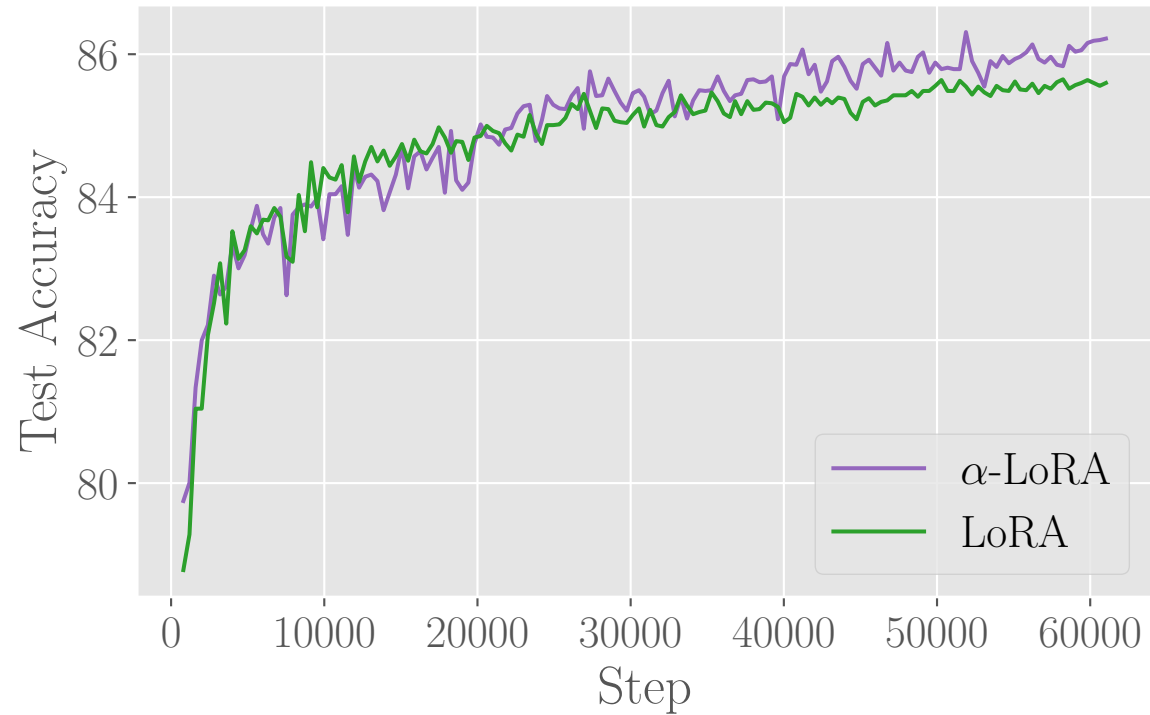

RTE benchmark

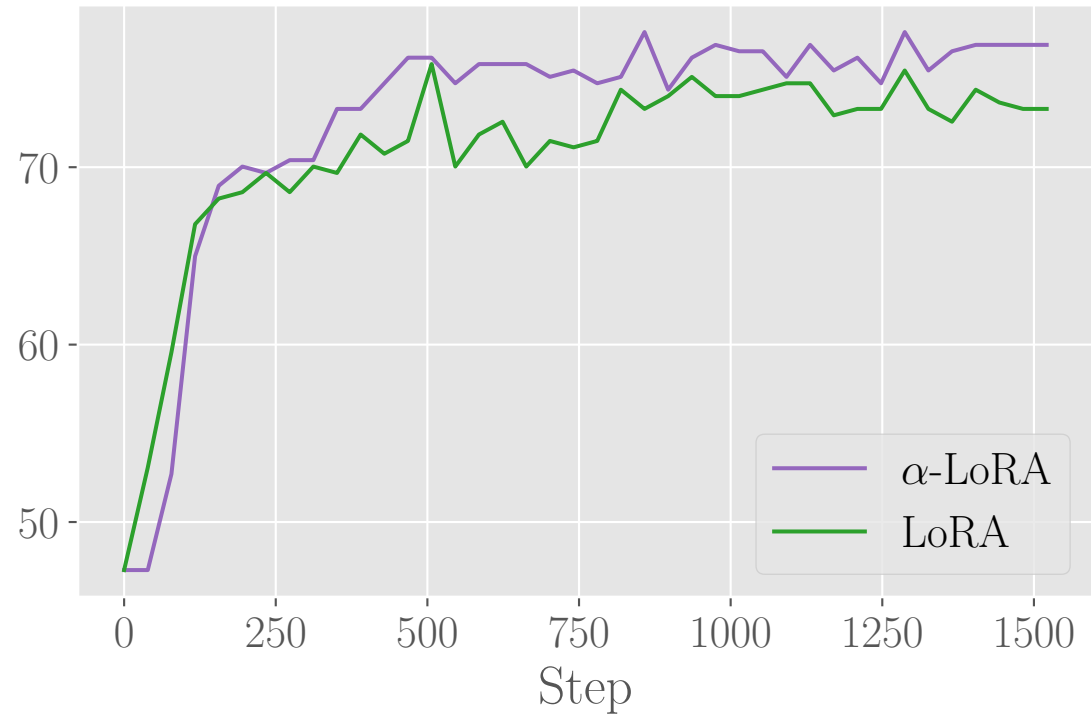

Supplement: supplementary_material [file roberta-glue-curves.pdf › Transfer-Learning/results-plot/roberta-glue-curves.pdf]
